---

1           **Meta-transcriptomic analysis reveals the gene expression and novel conserved**  
2                           **sub-genomic RNAs in SARS-CoV-2 and MERS-CoV**

3   Lin Lyu<sup>1†</sup>, Ru Feng<sup>1†</sup>, Mingnan Zhang<sup>1†</sup>, Qiyu Gong<sup>1</sup>, Yinjing Liao<sup>2</sup>, Yanjiao Zhou<sup>3</sup>, Xiaokui  
4   Guo<sup>1</sup>, Bing Su<sup>1</sup>, Yair Dorsett<sup>3\*</sup>, Lei Chen<sup>1\*</sup>

5

6   1 Shanghai Institute of Immunology, Shanghai Jiao Tong University School of Medicine,  
7   Shanghai 200025, China

8   2 College of Chemistry, Sichuan University, Chengdu 610064, China

9   3 Department of Medicine, University of Connecticut Health, Farmington, CT, USA

10

11   \* **Correspondence:**

12   Lei Chen: [lei.chen@sjtu.edu.cn](mailto:lei.chen@sjtu.edu.cn);

13   Yair Dorsett: [dorsett@uchc.edu](mailto:dorsett@uchc.edu)

14

15   <sup>†</sup> These authors contributed equally.

16

17

18

19

20

21

22

---

23 **ABSTRACT**

24 **Background:** Fundamental to viral biology is identification and annotation of viral genes and  
25 their function. Determining the level of coronavirus gene expression is inherently difficult  
26 due to the positive stranded RNA genome and the identification of sub-genomic RNAs  
27 (sgRNAs) that are required for expression of most viral genes. In the COVID-19 epidemic so  
28 far, few genomic studies have looked at viral sgRNAs and none have systematically  
29 examined the sgRNA profiles of large numbers of SARS-CoV2 datasets in conjunction with  
30 data for other coronaviruses.

31 **Results:** We developed a bioinformatic pipeline to analyze the sgRNA profiles of  
32 coronaviruses and applied it to 588 individual samples from 20 independent studies, covering  
33 more than 10 coronavirus species. Our result showed that SARS-CoV, SARS-CoV-2 and  
34 MERS-CoV each had a core sgRNA repertoire generated via a canonical mechanism. Novel  
35 sgRNAs that encode peptides with evolutionarily conserved structures were identified in  
36 several coronaviruses and were expressed *in vitro* and *in vivo*. Two novel peptides may have  
37 direct functional relevance to disease, by alluding interferon responses and disrupting IL17E  
38 (IL25) signaling. Relevant to coronavirus infectivity and transmission, we also observed that  
39 the level of Spike sgRNAs were significantly higher *in-vivo* than *in-vitro*, while the opposite  
40 held true for the Nucleocapsid protein.

41 **Conclusions:** Our results greatly expanded the predicted number of coronavirus proteins  
42 and identified potential viral peptide suggested to be involved in viral virulence. These  
43 methods and findings shed new light on coronavirus biology and provides a valuable resource  
44 for future genomic studies of coronaviruses.

45

46 **Key words: coronavirus, SARS-CoV-2, MERS-CoV, meta-transcriptome, sub-genomic**

47 **RNA**

48

---

## 49 **BACKGROUND**

50 Corona virus disease 2019 (COVID-19) reached pandemic levels beginning March 2020  
51 and brought unprecedented devastation to human lives and the global economy [1]. The  
52 causative agent is Severe Acute Respiratory Syndrome – Corona Virus - 2 (SARS-COV-2), a  
53 beta coronavirus similar to MERS-CoV, the only other active virulent beta-coronavirus.  
54 MERS-CoV is the causative agent of Middle Eastern Respiratory Syndrome (MERS) and is  
55 more virulent but less infectious than SARS-CoV-2 and is phylogenetically different from  
56 SARS-CoV-2 (less than 90% amino acid sequence homology). Both viruses have a positive  
57 single-stranded RNA genome of approximately 30 kilobases that is polyadenylated that  
58 encodes 4 structural proteins (spike (S), membrane (M), envelope (E) and nucleocapsid (N))  
59 that play similar roles within each virus. The two viruses diverge with respect to the receptor  
60 used for cell entry, their virulent accessory proteins and the specific function(s) of the 16 non  
61 structural proteins (nsp1 to nsp16). Nsp's are produced by viral proteinase cleavage of two  
62 large polyproteins encoded by ORF1a and ORF1b. ORF1 is closest to the 5' end and is  
63 directly translated from genomic RNA upon entrance into host cells and a ribosome skipping  
64 mechanism divides it into ORF1a and ORF1b [2]. While MERS-CoV encodes at least 5  
65 accessory proteins (ORF3, ORF4a, ORF4b, ORF5 and ORF8b), SARS-CoV-2 encodes at  
66 least 6 (ORF3a, ORF6, ORF7a, ORF7b, ORF8, and ORF10 [3]. All proteins not encoded by  
67 ORF1a or ORF1b, must be translated from sub-genomic RNAs (sgRNAs) [4, 5]. SgRNAs are  
68 generated via a mechanism termed discontinuous extension that uses short sequences of  
69 varying length (usually 6 to 12 nucleotides (nts)) termed Transcription Regulatory Sequences  
70 (TRS's) spaced between genes to pair a 3' portion of the negative viral strand to a

---

71 complementary 5' leader sequence of around 70 nts. This is followed by extension of the  
72 negative strand to the 5' end of the positive strand, generating a short negative strand sgRNA  
73 intermediat. The RNA intermediary is then replicated to generate a positive strand sgRNA  
74 that encodes viral protein(s) [6] (**Fig. 1A**).

75       Annotating viral transcriptomes is fundamental to understanding virus biology, which is  
76 a key aspect in combating viral transmission, replication and pathogenesis. Prior coronavirus  
77 outbreaks, such as the Severe Acute Respiratory Syndrome (SARS) outbreak in 2003 and the  
78 MERS outbreak that began in 2012 and is still ongoing [7, 8], has increased research on these  
79 viruses as well as coronaviruses of zoonotic origin from which human coronaviruses are  
80 thought to originate. Comparing transcriptional variation of different coronaviruses may  
81 reveal mechanisms behind their distinct pathogenicity and infectivity, and potentially explain  
82 the molecular etiology behind how species barriers are crossed. Systematically annotating  
83 differences in the transcriptional profiles of virulent coronaviruses that is buried within  
84 numerous metatranscriptomic data sets may shed new light on viral transmissibility and  
85 virulence. However, even a simple systematic comparison of their *in-vitro* transcriptional  
86 profiles is lacking.

87       For newly emerged SARS-CoV-2 virus, sequencing plays an essential role in diagnosis  
88 and monitoring of strain evolution [3, 9]. However, in general, sequencing data sets for  
89 SARS-CoV-2 and MERS-CoV are limited to the description of both viral and host transcripts  
90 generated during infection of *in-vitro* cell lines as well as model organisms. Analysis of viral  
91 transcriptomes originating from different viral strains in humans is overlooked as suitable  
92 analysis tools are lacking.

---

93 Sequence homology plays an essential role in the functional annotation of viral genes.  
94 However, sequence homology alone does not guarantee protein expression as rapidly  
95 mutating RNA viruses can harbor sequence alterations that result in novel or mutated ORFs  
96 that are not transcribed nor expressed. Therefore, direct profiling of viral RNAs is the step  
97 toward understanding which viral products can actually be generated. For SARS-CoV-2,  
98 direct profiling of viral RNAs produced in a cultured cell line was recently conducted using  
99 Oxford nanopore technology and identified the existence of a canonical and non-canonical  
100 viral transcriptome. All three of these studies used isolated virus strains to infect the Vero cell  
101 line isolated from kidney epithelial cells of the African green monkey that does not initiate an  
102 interferon (IFN) response upon infection. Although these studies establish a basic  
103 characterization of virus transcription, individual studies only characterize viral gene  
104 expression of a single viral strain and are unable to determine if viral transcriptional  
105 responses are altered in response to even the most basic of immune responses (e.g. IFN $\gamma$ )  
106 [10-12].

107 We developed a bioinformatics pipeline CORONATATOR (CORONAvirus annoTATOR)  
108 to quantify viral gene expression and identify bona-fide sgRNAs in numerous publicly  
109 available meta-transcriptomic data sets. Beyond outlining the variation in sgRNA profiles and  
110 their relative expression, our analysis identified novel sgRNAs for several different  
111 coronaviruses. It also revealed the presence of a core sgRNA repertoire that is shared between  
112 SARS and SARS-CoV-2 and one that is unique to MERS-CoV. A subset of novel sgRNAs for  
113 SARS-CoV-2 and MERS-CoV appear to be evolutionarily conserved in related coronaviruses  
114 found in bat and pangolin. Finally, we show that the transcription of specific sgRNAs differs

115 significantly in-vitro and in-vivo as well as between different coronaviruses.

116

## 117 **RESULTS**

### 118 **CORONATATOR profiles viral sgRNAs via alignment breakpoint analysis**

119 To systematically identify and compare coronavirus sgRNAs, we sought to identify  
120 publicly available coronavirus transcriptomic data sets. As of 2021/09/10, more than 3410427  
121 viral genome sequences were submitted to the Global Initiative on Sharing All Influenza Data  
122 (GISAID) [13]. However, few data sets contain the raw sequencing reads. Using the search  
123 term “coronavirus” along with manual curation, we located raw reads in a total of 19  
124 Bioprojects within the NCBI Short Read Archive that contain 588 samples for SARS-CoV-2  
125 as well as related coronaviruses, such as SARS and MERS (**Table S1**). We also used an  
126 additional dataset with a single sample that was recently published [10].

127 To profile the sgRNAs present within these data sets, we developed an informatics  
128 pipeline (CORONATATOR). CORONATATOR is designed for the utilization of sequences  
129 produced by highly accurate second generation sequencing technology that permits  
130 identification of TRS sequences from individual reads. Direct RNA Sequencing on the  
131 Oxford Nanopore platform can also be used to profile viral sgRNAs but is currently not  
132 supported by CORONATATOR due to the limited data set availability as well as its  
133 restrictions in terms of sequencing accuracy and read length bias (see **Methods**).

134 Briefly, raw reads were first aligned to their respective viral references, i.e.  
135 SARS-CoV-2 (GeneBank ID NC\_045512.2), SARS-CoV (GeneBank ID NC\_004718.3),

---

136 MERS-CoV (GeneBank ID NC\_019843.3) or reference for other species of  
137 coronaviruses(**Table S1**). Specific sgRNAs were inferred from alignment breakpoint analysis  
138 that identified reads that spanned the junctions between the 5' leader sequence and more  
139 distal genomic sequence (**Fig. 1A and Supplementary Methods** ). The relative abundance of  
140 a specific sgRNA to all sgRNA's in a particular sample is analogous to relative gene  
141 expression. We constructed a heatmap to determine how viral genotype and viral origin  
142 (e.g.-in-vivo vs in-vitro) influences viral gene expression (**Fig. 3** and discussion below).

143 CORONATATOR was designed to profile all possible breakpoints. However, to obtain  
144 bona-fide sgRNAs, we removed both rare breakpoints and breakpoints that were inconsistent  
145 across samples. A complete breakpoint consists of two separate genomic positions (**Fig. 1A**).  
146 We also analyzed non-sgRNA breakpoints, for which the 5' position does not encompass the  
147 leader TRS. Our data suggested that non-sgRNA breakpoints are very rare (usually below  
148 0.05% of total sgRNA breakpoints) and inconsistent, as these breakpoints were never  
149 identified in more than a single study. We therefore focused on sgRNAs formed with the  
150 canonical 5' leader and a 3' body part.

151

### 152 **Most predicted coronavirus ORFs can be validated by sgRNA analysis**

153 Many ORFs are annotated for SARS-CoV-2 based on consensus sequence annotation  
154 and the existence of some are disputed by proteomics as well as sequencing studies [3, 11].  
155 Only after examination of a large number of data sets from multiple studies were we able to  
156 confidently assign commonly annotated ORFs into one of three categories (core, low support  
157 and no support) (**Fig. 1B**). Identifying bonafide sgRNAs requires multistudy and multisample



158 analysis as unique artifactual sequences are often generated during sequence library  
159 preparation or sequencing([14, 15]). Additionally, many non-canocical sgRNAs found in low  
160 abundance may be random aberrant transcripts without dedicated function (Kim et al, 2020).  
161 Therefore, only sgRNAs that are present in multiple studies and data sets are true sgRNA  
162 candidates. To classify each viral gene we considered factors such as sgRNA relative  
163 abundance, TRS conservation and the potential for leaky ribosome scanning that can be  
164 affected by start-codon hijacking[16].

165 We first validated the commonly annotated ORFs for SARS-CoV-2, SARS-CoV and  
166 MERS-CoV by looking at the extent of sequencing evidence that supports the existence of  
167 specific sgRNAs. For SARS-CoV-2, thirty four samples were kept after removing those with  
168 less than 20 sgRNA reads. To identify robust and consistent sgRNAs that represent the “core”  
169 repertoire, which we assign to our first sgRNA catagory, we pooled all sgRNAs identified for  
170 a specific virus using a weighted average approach (see Methods) and noted their relative  
171 abundance. At a relative abundance of 0.5%, 8 canonical breakpoints emerged corresponding  
172 to 8 sgRNA species that harbor 8 well-described ORFs for SARS-CoV-2: S, E, M, N, ORF3a,  
173 ORF6, ORF7a and ORF8 (**Fig.1B-C, Fig. S2A, Table S2, Table S3**). The sgRNA breakpoints  
174 for these ORFs are situated between 9 and 162 nt upstream of the start codon. N is the most  
175 abundant core sgRNA, representing 54% of the core sgRNAs identified in all samples. The E  
176 sgRNA is the least abundant at 1.5%, and the only core protein not identified in recent  
177 proteomics studies [11, 17]. ORF7a, M, ORF3a, S, ORF8 and ORF6 are present at 10.6%,  
178 8.4%, 6.9%, 6.1%, 5.9 and 2.7% respectively. Together, these 8 core sgRNAs account for 70%  
179 to 100% of the total sgRNAs depending on sample type (e.g. *in-vivo* vs *in-vitro*), viral strain

180 and read coverage (**Fig. 2, Table. S3**).

181       Beside their high relative abundance, these 8 core sgRNA are also defined by a shared  
182 canonical body TRS with a converseved core sequence of “ACGAAC”, which is unique to  
183 this group of sgRNAs. This core sequence could be necessary and sufficient for sgRNA  
184 formation. Futhermore, the same 8 core sgRNAs, as well the core TRS sequence, were shared  
185 by SARS (Fig. S2). The 7 core sgRNAs for MERS following (S, E, M, N, ORF3, ORF4a and  
186 ORF5) (Fig. 1C) also utilize this core sequence, with the exception of N that has a TRS  
187 which contains “ACGAA”.

188       A second category of sgRNA was generally present at low relative abundance and does  
189 not use this core sequence a conserved core TRS sequence. This category include ORF7b in  
190 SARS-CoV-2 and SARS-CoV, ORF3b in SARS and ORF4b and ORF8b in MERS-CoV. For  
191 SARS-CoV-2, E has an average relative abundance of 1.5% which is the lowest amongst the  
192 core ones, while ORF7b’s is only 0.02% . This low abundance or low efficiency in sgRNAs  
193 formation may result from the use of noncanonical TRSs. This group of sgRNAs do not use  
194 the conserved core TRS sequence as core sgRNAs do, meaning the sequence homology they  
195 rely on for recombination is always shifted a few bases from the core and quite often they  
196 contain mismatches between leader and body TRS.

197       Other predicted ORFs fell into the third category with no sgRNA support, at least in the  
198 data set we examined. When factor in evidence beyond sgRNA support. This category can be  
199 futher divided into two sub-categories. The first would be no sgRNA support but can  
200 potentially be translated. It has been observed that some coronavirus ORFs can be expressed  
201 via a leaky ribosome scanning mechanism [16]. ORF9b of SARS-CoV-2 falls into this

202 sub-category. Indeed, multiple recent proteomics studies showed support for the ORF9b  
203 protein product in SARS-CoV-2[17, 18]. Its homolog in SARS-CoV, also named ORF9b,  
204 falls in the same category. Interestingly, the ORF7b of SARS-CoV-2 and SARS-CoV were  
205 mentioned in previous studies to be in this category (Schaecher et al., 2007), and indeed the  
206 long stretch (362 nt in SARS-CoV-2 and 365 nt in SARS) between start codons of ORF7b  
207 and preceding ORF7a are void of additional start codons. Yet, these gene products still form  
208 their own sgRNAs at low abundance.

209 The second sub-category would contain the most suspicious ORFs, where sgRNA  
210 support cannot be found and intervening start codon between them and the closest sgRNA  
211 breakpoint would make their expression very unlikely. This category includes a few  
212 commonly annotated ORFs: ORF3b, ORF9c and ORF10 of SARS-CoV-2, ORF8b in  
213 SARS-CoV. The several out of frame start codons between these ORFs and preceding ones,  
214 along with the absence of corresponding sgRNAs and its absence from proteomic studies [10,  
215 17, 18], strongly argues that these proteins are not generated. Indeed, the existence ORF10  
216 was recently debated in recent manuscripts [11, 12]. The evidence described above indicates  
217 the potential pitfalls of conducting experiments on viral products from putative ORFs with no  
218 sgRNA or proteomic support. For example, a recent study that generated a synthetic version  
219 of the predicted truncated version of ORF3b in SARS-CoV-2 speculated that the putative  
220 truncated version in SARS-CoV-2 had a stronger anti-IFN activity than the SARS version  
221 [19].

222

223 **Identification of novel sgRNAs with non-canonical TRSs in SARS-CoV-2, MERS-CoV**

224 **and SARS-CoV.**

225 As mentioned before, during formation of the core sgRNA repertoire, a body TRS that  
226 contains a minimal core sequence will pair with the leader TRS. For each particular core  
227 sgRNA, the two TRS's used must be of the same length and sequence, although the length  
228 can vary between sgRNAs (**Fig. 1C**). We found the average length of these canonical TRS's  
229 for SARS-CoV-2 was ~9.6 nts. Interestingly, the same core sequence is used in SARS, while  
230 MERS also uses a six nucleotide TRS with a different core sequence (**Fig. S2A,B**).

231 When we looked for sgRNAs that composed more than 0.2% of sgRNA transcripts, we  
232 identified three additional sgRNAs that were present in at least two separate samples and  
233 studies (**Fig. 2A**). All three novel sgRNAs contained breakpoints that did not utilize canonical  
234 TRS sequences that are present in core sgRNAs. The three breakpoints support the  
235 discontinuous extension model of sgRNA formation, as the sequence from the body strand  
236 was found in the TRS sequences of the final transcript (**Fig. 2B, Fig. S3A-C**). On a separate  
237 note, sequence analysis of stranded RNA library preps identified the presence of negative  
238 strand sgRNAs, which were not described in the previous Nanopore sequencing manuscripts  
239 [10-12]. As previously noted for artificial TRS's, analysis of these non-canonical breakpoint  
240 sequences revealed that TRS's without perfect complementarity may pair, and/or that large  
241 regions of complementarity around a core TRS between the body to itself, maybe used for the  
242 formation of sgRNAs (**Fig. 2B**). Our analysis confirmed that TRS sequences can vary  
243 significantly between distantly related viruses and find that canonical TRS sequences can be  
244 more than 30 nt in length in some coronaviruses (**Fig. S2D**).

245 The three novel TRS's generated three novel sgRNAs that we have termed putative

246 ORF2b (pORF2b), alternative M (aM) and truncated ORF7b (tORF7b). The longest novel  
247 sgRNA, pORF2b, is within the S gene and has two alternative TRS's positioned around  
248 22501. Interestingly, it encodes a novel peptide that has a domain structure that is conserved  
249 in closely related coronaviruses, with at least one virus harboring and extended ORF (**Fig.**  
250 **2B,C**). The second novel breakpoint is located at 26494, 31 nt downstream of the canonical  
251 breakpoint for M. The sgRNA would support M expression, but with an alternative 5' UTR  
252 (**Fig. S3A**). The shortest of the three novel sgRNA's has its breakpoint positioned at 27761  
253 and codes for a truncated version of ORF7b (tORF7b). The truncation removes the  
254 extracellular domain and 14 of the 24 amino acids that comprise the transmembrane domain  
255 (**Fig. 2A, Fig. S3B**). This sgRNA is expressed at relatively high levels both *in-vivo* and  
256 *in-vitro* and likely harbors novel functions (see discussion below).

257 Translation of pORF2b results in a 36 amino acid peptide. It was predicated by PSIPRED  
258 [20] to have a intracellular protein binding coil and two short alpha-helices that overlap a  
259 transmembrane domain, with the second alpha helix partially extracellular (**Fig. 2A, C**).  
260 pORF2b was present in 4 samples in two separate studies. The highest expression of pORF2b  
261 was observed in a patient derived sample from Washington State in the US (SRX7884411),  
262 where it accounted for a substantial 11.1% of the total sgRNAs. In a separate patient sample  
263 (SRX7884409) from the same bioproject, the novel ORF represented 1.1% of the sgRNAs  
264 identified (**Table. S3**). The virus strains infecting these two patients differed by one  
265 nucleotide. Five other patient samples from the same study with different viral strains (**Table.**  
266 **S3**) did not yield sgRNAs for pORF2b. The low breakpoint read numbers for these samples  
267 as well as viral strain may contribute to the variable detection of pORF2b *in-vivo*. This

268 indicates that the level of pORF2b transcripts maybe loosely correlated with viral strain and  
269 further demonstrates that samples within this bioproject are not cross contaminated with an  
270 artifactual pORF2b sgRNA. SgRNA pORF2b was also identified in a separate study  
271 (PRJNA615032), in two in-vitro samples that used a different viral strain than any of those  
272 identified in the *in-vivo* study (**Table. S3**).

273 We searched for sequence conservation of pORF2b in other related Sarbecoviruses,  
274 including SARS-CoV, HKU3 (bat coronavirus), RaTG13 (a bat coronavirus proposed to be  
275 directly related to SARS-CoV-2) and a coronavirus infecting pangolin (SRX7732088)[21]. A  
276 corresponding ORF was identified in all four viruses, with the highest level of homology  
277 found in RaTG13, with 91.89% nucleotide identity (**Table S4 & Fig. 2C**). Interestingly,  
278 pORF2b and more so the pangolin version which has a C terminal extension, share high  
279 similarity with the ligand binding domain of human IL17RB (**Fig. 2D and see section**  
280 **“Discussion”**).

281 The third novel breakpoint was located at position 27761, within ORF7b, and encodes a  
282 truncated version of ORF7b (tORF7b). We identified this transcript and its relative abundance  
283 *in-vivo* and *in-vitro* in two separate bioprojects that included more than one viral strain. This  
284 transcript was also recently identified in a VERO cell line infected by a single viral strain  
285 [10]. Interestingly, this novel sgRNA was expressed at relatively high levels both *in-vivo* and  
286 *in-vitro* (**Fig. 3**), and a SARS-CoV homolog of this sgRNA was also present in several  
287 samples across two studies. This truncated version of ORF7b is missing the intracellular  
288 domain and more than half of its transmembrane domain, while retaining its hydrophilic  
289 extracellular domain (**Fig. S3D**). ORF7b is present in the SARS-CoV virion particle and is

290 homologous ORF7b encoded by SARS-CoV-2 [16]. The portion of ORF7b encoded by  
291 tORF7b is highly conserved in SARS (**Table S4 & Fig. S3D**). Intriguingly, a previous study  
292 observed that a 45 nt deletion in SARS ORF7b that removes much of the transmembrane  
293 domain lost in tORF7b, attenuated the induction of interferon-beta, provides a replicative  
294 advantage *in-vitro* and *in-vivo* as well as to cells pretreated with interferon-beta [22]. Future  
295 research will reveal if this novel sgRNA encodes a novel virulent peptide that has function(s)  
296 antagonistic to IFN while subverting the initiation of an interferon response.

297 We also obtained a significant amount of *in-vivo* and *in-vitro* sequence data sets for  
298 MERS-CoV, allowing us to identify abundant non-canonical sgRNAs (**Fig. S2B**). This novel  
299 sgRNA (putative ORF8c or pORF8c), is predicted to encode a ORF that translate into a novel  
300 51 amino acid peptide. This novel sgRNA was identified in 5 separate studies, both *in-vivo*  
301 and *in-vitro*, ranging in abundance from 0.03% to 1.0% of total sgRNAs. PSIPRED suggest  
302 this novel peptide has a transmembrane domain connected to a cytoplasmic helix domain. We  
303 also looked for its conservation in other Merbecoviruses, including HKU4, HKU5 and an  
304 Erinaceus coronavirus. pORF8c could be found in all 3 with varying conservation (**Fig. S3E,**  
305 **Table. S4**). The cytoplasmic N terminal was the most conserved across Merbecovriuses and  
306 C terminal elongated versions were observed in HKU5 and Erinaceus (**Fig. S3E**).

307 To exhaust our search for novel sgRNAs, we lowered our threshold value to a relative  
308 abundance of 0.01%, while maintaining our other criteria. This analysis identified additional  
309 novel sgRNAs that appeared in more than one study for SARS-CoV-2, SARS-CoV and  
310 MERS-CoV (**Table S5**). Additional sequencing and future experiments will determine the  
311 significance of pORF2b, tORF7B and aM as well as the numerous other novel sgRNAs

312 present at extremely low abundance.

313

314 **CORONATOR detects experimentally induced alteration of novel pORF8c relative**  
315 **abundance.**

316 We next wished to validate the experimental utility of our pipeline and validate that a  
317 novel sgRNA responds to experimental stimuli in a manner similar to other established viral  
318 genes. To accomplish this, we utilized an experimental data set that tested the effects of  
319 Gleevec and IFN- $\beta$  on host gene expression during treatment of MERS-CoV infection  
320 in-vitro (PRJNA233943 & PRJNA233944) (**Fig. S5**). Specifically, we analyzed the effects on  
321 viral load, viral gene expression and the expression of novel pORF8c. Initial analysis  
322 demonstrated that decreased viral load broadened the expression of individual viral genes  
323 (**Fig. S5**). Importantly, even at low viral loads, the ratio of N to S remained high,  
324 demonstrating that this ratio is not influenced by viral abundance, but by *in-vitro* and *in-vivo*  
325 context. The effect of both Gleevec and IFN- $\beta$  on viral gene expression was not uniform,  
326 having different effects on different viral genes. Interestingly, the expression profile of novel  
327 pORF8c followed the same trend of N and E with respect to viral load in response to IFN- $\beta$   
328 and Gleevec. This demonstrates that pORF8c has the same biological response in terms of  
329 gene expression as some “core” sgRNAs in this context.

330

331 **The relative abundance of Spike sgRNAs is elevated for SARS-CoV-2 *in-vivo*.**

332 When processing the data sets, we noticed two distinct patterns of read coverage along  
333 the SARS-CoV-2 reference genome that suggested that viral reads originate from two sources.



334 Upon further examination, it was revealed the two sources were *in-vivo* and *in-vitro* derived  
335 samples (**Fig. S1**). The former is composed of extracellular virion particles and infected host  
336 cells present in BALF (human) and nasal washes (Ferret) or lung homogenate (MERS), while  
337 the latter is composed of infected cells that are not subject to systemic or sometimes innate  
338 (e.g. VERO cells do not produce IFN) anti-viral responses. *In-vivo* derived viral sequences  
339 obtained primarily from BALF for SARS-CoV-2 (primarily BALF) generally covered the  
340 entire viral reference length, with little bias towards the sgRNA containing 3' end. In contrast,  
341 highly elevated coverage at the 3' end of the viral genome was observed in the *in-vitro*  
342 samples due to the formation of nested sgRNAs during viral transcription.

343 SARS-CoV-2 and MERS-CoV are the only active virulent coronaviruses and are present  
344 in both *in-vivo* and *in-vitro* derived metatranscriptomic data sets. We analyzed the relative  
345 abundance of sgRNAs generated *in-vivo* and *in-vitro* for both SARS-CoV-2 and MERS-CoV.  
346 When comparing the relative abundance of viral sgRNAs generated *in-vivo* to those  
347 generated *in-vitro*, it was evident that the ratio of S sgRNAs to N sgRNAs was significantly  
348 higher *in-vivo*, especially for SARS-CoV-2 (0.04 *in-vitro* vs 0.69 *in-vivo* for SARS-CoV-2, p  
349 value 0.0012 with Wilcoxon ranksum test) (**Fig. 4A-B, Fig. S4**). The differences in  
350 environmental pressures that influence the requirement for these sgRNAs for viral  
351 replication, provides a general explanation for this striking variation in sgRNA levels. The  
352 selective pressures may alter viral transcriptional responses that promote viral propagation.  
353 For example, the primary function of the S protein centers around host cell recognition and  
354 invasion while the primary function of the N protein centers around the regulation of viral  
355 RNAs to promote viral replication. This is mediated by direct binding of the 3' end of the

356 viral genome, the viral packaging signal as well as TRS's [23-25]. Another explanation,  
357 which is not mutually exclusive, is that the increased S/N ratio *in-vivo* is due to an altered  
358 viral Replication Transcription Complex (RTC) that favors TRS read-through, preferentially  
359 generating longer sgRNAs. Such a “global” alteration of viral transcription likely involves  
360 host factors, as observed for Infectious bronchitis virus (IBV), a gamma coronavirus in which  
361 the N protein is phosphorylated by cellular GSK3 to recruit the helicase DDX1 to promote  
362 TRS read through during the formation of long sgRNAs [26]. In this regard, the N protein is  
363 generated from the shortest sgRNA while the S protein is generated from the longest. Future  
364 electron microscopy studies on *in vivo* and *in-vitro* viron particles will determine if Spike  
365 sgRNA abundance in SARS-CoV-2 correlates with spike protein levels on viron surfaces.  
366 Other examples of sgRNAs that are significantly differentially expressed *in-vitro* and *in-vivo*  
367 include the overall increase in the levels of accessory sgRNAs that act via multiple pathways  
368 to quell the immune response in both SARS-CoV-2 and MERS-CoV (**Fig. S4**, [27]).

369 To obtain a clearer perspective on how the relative abundance of SARS-CoV-2 sgRNAs  
370 compares to other coronaviruses *in-vivo* and *in-vitro* as well as determine if additional novel  
371 sgRNAs have been overlooked, CARONTATOR was utilized to analyze additional  
372 coronaviruses. This analysis included OC43, NL63, HKU1 as well as bat and pangolin  
373 viruses with high sequence homology to SARS-COV-2 [9, 21] (**Fig 4C**, **Table S1** and **Fig.**  
374 **S2**). Some datasets did not yield enough breakpoint reads to be informative. For example,  
375 analysis of the the bat virus RaTG13, with the highest homology to SARS-COV-2, yielded  
376 only 1 break point read and was therefore omitted from **Fig. 4C**.

377 Of the different coronaviruses profiled, SARS-COV-2 stands out as having the highest

378 levels of S sgRNAs, especially *in-vivo* (see discussion below and **Fig. 4C**). Our analysis  
379 indicates that this is independent of viral strain as it is present at high levels in different  
380 strains identified *in-vivo* (**Fig. 2**). The high levels of Spike protein may play a role in the  
381 viruses ability to cross the species barrier (see discussion below) and it's high rate of  
382 infectivity. In agreement, we noted that the relative levels of the Spike sgRNA is positively  
383 correlated with coronavirus infectivity. Viral infectivity and levels of S sgRNAs *in-vivo* are as  
384 follows: SARS-COV-2> HKU1> MERS [28]. However, S protein levels alone are not  
385 sufficient to cause high levels of SARS-CoV-2 transmissibility, as factors such as Spike  
386 protein stability, receptor avidity [29] and viron stability[30], also contribute to viral  
387 transmissibility.

388

### 389 **Mutations in the RTC reverse the expression of N and S sgRNAs in vitro and in-vivo.**

390 We also observed mutations in viral RTC components that altered the expression profile  
391 of S to N. Specifically, the viral strain Kim 2020 had one unique non-synonymous mutation  
392 in the RTC component nsp3, a papain protease that binds the N and M protein (**Fig. 3**). The  
393 transcriptome generated *in-vitro* for this viral strain showed a dramatic increase in the S to N  
394 ratio, mimicking the expression profile of viruses found *in-vivo* (**Fig. 3, Fig. S6**). Interestingly,  
395 a viral strain identified *in-vivo* (SRX7852918), had two non-synonymous mutations in nsp3,  
396 as well as nsp6 and nsp12 and had an *in-vitro* like transcription profile, with a decreased S to  
397 N ratio (**Fig. S6**).

398 The observation that mutations in nsp3 occur in the two viruses with altered gene  
399 expression is thought provoking. Nsp3 is reported to to bind TRS's, the 3' end of the viral

400 genome, the global viral RNA packaging signal as well as the N and M proteins [23, 31, 32].  
401 Additionally, phosphorylation of the N protein has been reported to alter its conformation to  
402 preferentially bind viral RNA and as mentioned above for IBV, promote TRS readthrough  
403 during the generation of long sgRNAs [26, 33]. This observation tentatively implies that  
404 mutations within nsp3 affect the relative abundance of sgRNAs by acting in a global  
405 mechanism that influences overall viral structure and may act in concert with the mechanism  
406 described above for IBV. Additionally, the altered relative abundance of N sgRNAs *in-vivo*  
407 and *in-vitro* due to mechanisms discussed above, may feedback on its interaction with Nsp3  
408 and influence the function of mutations in Nsp3 *in-vivo* and *in-vitro* (**Fig. 4A-B**).

409

## 410 **DISCUSSION**

411 The vast amount of sequence data generated for SARS-CoV-2 thus far has primarily been  
412 used for the typing and following of emerging viral strains. Although this is important, we  
413 felt such a focus could be an under-utilization of a valuable information. By developing the  
414 Coronator informatics pipeline, we took a step beyond the characterization of viral strains  
415 and described coronavirus viral sgRNA expression and uncovered novel and conserved  
416 sgRNAs with unknown function that are generated via a non-canonical TRS pairing  
417 mechanism (**Fig. 2**). Functional prediction for some of these novel putative proteins is still  
418 ongoing. We tentatively show that a homolog of SARS-CoV-2 pORF2b in pangolin virus  
419 shares extensive similarity with human IL17RB's ligand binding domain (**Fig. 2D**). It is  
420 curious that a coronavirus may generate a peptide that could theoretically disrupt IL17B and

---

421 IL17E (IL25) signaling as they are generally associated with promoting or inhibiting  
422 inflammatory responses in specific contexts. Future proteomic studies and/or ribosome  
423 sequencing studies will be required to verify the production of the protein products encoded  
424 by the novel sgRNAs identified here.

425 The analysis presented here also implicates that different strains of SARS-CoV-2  
426 express sgRNAs at different levels (**Table S3, Fig. 3**), especially for the newly discovered  
427 sgRNAs. Our findings underscore that a true understanding of viral pathogenesis in terms of  
428 sgRNA expression can only come from thorough sequencing of patient samples in which the  
429 virus is under selective pressure. This begs for in-depth case examination, in which thorough  
430 sequencing and analysis is conducted for different stages of COVID-19 on a strain by strain  
431 basis. This would result in truly individualized patient care.

432 Although other zoonotic viruses may share extensive sequence similarity to  
433 SARS-CoV-2 at the gene or genomic level, similarity alone is not sufficient for the generation  
434 of pathogenic human viruses. Generally not considered during discussion of zoonotic viral  
435 origins, the specific expression level of viral genes, such as the Spike protein, are likely  
436 important for crossing the species barrier. For example, considering the vast number of  
437 un-sampled zoonotic viruses, it is likely Spike proteins capable of crossing the species barrier  
438 already exist, yet are not expressed at sufficiently high levels to enable sustainable  
439 inter-human transmission. However, low level Spike protein expression would allow sporadic  
440 transmission from bat to human, yet would not be sustainable as human to human transmission  
441 would be low due to low S protein expression as well sanitary environments that do not exist  
442 for bats. In agreement, it has been observed that people living in proximity to bat caves

443 harbor virus specific antibody without ever experiencing severe disease [34].

444 Our analysis of the meta-transcriptomic data sets identified numerous sources of RNA,  
445 such as host RNA as well as microbial RNA (although not optimally captured). In a time  
446 when it is unclear why some people succumb to SARS-CoV-2 infection while others do not,  
447 these valuable sequences should not be wasted and could be made more useful if more  
448 clinical information is shared for these data sets. Most GISAID entries for SARS-CoV-2 have  
449 a meta-transcriptomic dataset that supports it. However, current GISAID entries that simply  
450 outline the viral genome sequence and strain far outnumber the raw read entries we  
451 identified in SRA. Sharing the raw read information will greatly help researchers study this  
452 virus and ultimately curb it.

## 453 **CONCLUSIONS**

454 We developed a bioinformatics pipeline CORONATATOR that can take meta-transcriptomic  
455 sequencing reads generated from coronavirus samples and analyze the sub-genomic RNA  
456 profiles of the underlying virus, akin to a transcriptome for the virus. For emergent viruses,  
457 as in the case of SARS-CoV2, homology search was usually the first and only choice of  
458 predicting viral ORFs after sequencing was done. Now our tool can provide additional  
459 evidence. By applying it to large number of SARS-CoV2 and related viral datasets,  
460 interesting biology about these coronaviruses were revealed. In addition to define core and  
461 predict novel ORFs, our results suggested, for beta-coronaviruses, the spike to nucleocapsid  
462 ratio to be a potential tunable in adjusting viral life style and the elevation of this ratio in  
463 SARS-CoV2 may contribute to its strong transmissibility. The methods and findings

464 presented here provides a valuable resource for future genomic studies of coronaviruses.

## 465 **METHODS**

### 466 **Data collection**

467 All sequencing data used were collected from NCBI Short Reads Archive (SRA). Some  
468 nanopore datasets were downloaded from online repository described in their respective  
469 manuscripts [10]. The bioprojects were located by searching with key words “coronavirus”  
470 and with manual curation, only meta-transcriptomic data were kept Raw reads files were  
471 downloaded from SRA using wget with a customized script, SRAtoolkit were used to  
472 generate compressed fastq files from downloaded sra files. After initial sequence alignment  
473 using bwa with reference genome sequences of SARS-CoV , SARS-CoV-2 or MERS-CoV,  
474 samples with too few viral reads were filtered out. CORONATATOR only uses reads  
475 generated from second generation technologies (Illumina), nanopore data were used for  
476 comparison.

### 477 **Coronator**

478 CORONATATOR were a series of perl and bash scripts developed for profiling and analysis  
479 of RNA-Seq data from coronavirus. It consists of 3 major steps, including preprocessing,  
480 breakpoint identification, sgRNA calling and profiling, details below.

### 481 **Preprocessing**

482 BAM files were generated from sequence alignment with reference genomes of SARS-CoV ,  
483 SARS-CoV-2 or MERS-CoV, for viruses from bat and pangolin, responsive genome  
484 assemblies were obtained from NCBI as references. SNPs were called and filtered with

---

485 bcftools [35] and annotated with vcf-annotator [36]. In addition, consensus genome  
486 sequences were also generated with filtered SNPs for further analysis.

### 487 **Breakpoint identification**

488 Breakpoints were identified from alignments with soft or hard clips, these alignments were all  
489 partial alignments largely caused by reads with recombination joints, which was generated by  
490 the mechanism through which coronavirus produce their sgRNA. In this step, a matrix of  
491 reads' information, breakpoint sites, CIGAR strings together with possible TRS sequences  
492 was generated.

### 493 **sgRNA calling and profiling**

494 Typical sgRNAs were identified and defined by two breakpoint coordinates on a reference  
495 genome sequence, these sites were obtained by extracting breakpoints from partial alignments,  
496 i.e. one from primary alignment and the other from supplementary alignment. To recognize  
497 possible TRS pattern, sequences between breakpoint pairs were extracted from previous  
498 generated consensus genome sequences. After that, corresponding genes of called sgRNAs  
499 were identified by manually comparing the distances between start codons of known viral  
500 genes and their breakpoints. Biosamples with more than 20 sgRNAs were used for further  
501 analysis, in these samples, sgRNAs were counted by genes and normalized by total sgRNA  
502 count to obtain a transcription profile matrix.

### 503 **Novel ORF identification**

504 Potential ORFs were predicted using Prodigal [37] with -s arguments to write all potential  
505 genes. An in-house python script was also used to identify very short ORFs. Then for  
506 sgRNAs with multiple bioproject support, we calculated and sorted the distances between



507 their breakpoints and all identified start codon sites. ORFs that start closest to upstream  
508 breakpoints were bookmarked and manually checked for verification.

### 509 **Sequence alignment and phylogenetic analysis**

510 Consensus genome sequences of SARS-CoV-2, SARS-CoV, MERS-CoV and biosamples  
511 from bat or pangolin or other human coronavirus with more than 20 sgRNAs were used for  
512 phylogenetic analysis. Multi-sequence alignment were performed with MAFFT [38],  
513 Maximum likelihood consensus trees were constructed using IQ-TREE [39] with 1000  
514 bootstrap times.

### 515 **Converting Nanopore sgRNA proportion to short reads'**

516 Kim et al included both nanopore data and short read data. The ratios between the two were  
517 used to convert the other nanopore data sets to proportions comparable with others in this  
518 study.

### 519 **Plots and statistical analysis**

520 Heatmaps showing gene expression profile were produced using 'heatmap.plus' package.  
521 SgRNA expression dot plots and boxplots were made with 'ggplot2' package to compare  
522 difference between gene expression among different sample origin, T-test and wilcoxon test  
523 were used for statistical analysis.

### 524 **Function annotation**

525 Novel peptide sequences were aligned with EMBL online tool FASTA  
526 (<https://www.ebi.ac.uk/Tools/sss/fasta/>) against UniProtKB/Swiss-Prot database with default  
527 arguments. NCBI CD Blast online service was used to identify protein domains.

### 528 **Sequence conservation**

---

529 To check for sequence conservation of putative peptides in related viral species, we generated  
530 a reference database containing all predicted ORFs from related viral genomes. DC  
531 MegaBlast (DisContinuous MegaBlast) was used to search for inter-species homologs.  
532 Arguments were set as follows: window\_size 0, gapopen 0, gapextend 2, penalty -1, reward 1,  
533 num\_alignments 1. A group of homologous ORFs were then subjected to multiple sequence  
534 alignment (MSA) using MAFFT. After that CLUSTAO (Clustal Omega) was used to  
535 calculate an identity matrix for the MSA result. The same procedure was performed for both  
536 nucleotide and amino acid sequences.

## 537 **ABBREVIATIONS**

538 sgRNA: sub-genomic RNA

539 ORF: open reading frame

540 TRS: Transcription Regulatory Sequences

541 COVID: Corona virus disease

542 MERS: Middle Eastern Respiratory Syndrome

543 SARS: Severe Acute Respiratory Syndrome

544 CORONATATOR: CORONAvirus annoTATOR

## 545 **DECLARATIONS**

546 **Ethics approval and consent to participate:** Not applicable.

547 **Consent for publication:** Not applicable.

548 **Availability of Data and Materials:** All used sequencing data are accessible with accession

549 number provided in supplementary table 1, code of CORONATATOR is accessible at:  
550 <https://github.com/15274972986/CORONATATOR>.

551 **Competing interests:** The authors declare that they have no competing interests.

552 **Funding:** This study was supported by Shanghai Institute of Immunology COVID-19 Special  
553 Fund.

554 **Authors' contributions:** Conceptualization: Lei Chen; Methodology: Lei Chen, Lyu Lin;  
555 Investigation: Lyu Lin, Ru Feng, Mingnan Zhang, Yinjing Liao; Visualization: Lyu Lin, Qiyu  
556 Gong; Supervision: Lei Chen, Xiaokui Guo, Bing Su, Yanjiao Zhou; Writing—original draft:  
557 Lei Chen, Yair Dorsett, Lyu Lin; Writing—review & editing: Lei Chen, Yair Dorsett, Lyu Lin,  
558 Ru Feng.

559 **Acknowledgements:** We thank Dr. Qiming Liang of Shanghai Institute of Immunology for  
560 his insightful suggestion.

561

562

## 563 REFERENCES

- 564 1. WHO: **World Health Organization: Coronavirus disease 2019 (COVID-19) Situation**  
565 **Report.** In., vol. 2020: World Health Organization; 2020.
- 566 2. Knipe DM, Howley PM: **Coronaviridae.** In: *Fields virology.* vol. 28, sixth edn.  
567 Philadelphia: Wolters Kluwer Health/Lippincott Williams & Wilkins; 2013: 825-859.
- 568 3. Wu F, Zhao S, Yu B, Chen YM, Wang W, Song ZG, Hu Y, Tao ZW, Tian JH, Pei YY *et al*:

- 
- 569     **A new coronavirus associated with human respiratory disease in China.** *Nature* 2020,  
570     **579**(7798):265-269.
- 571     4. Brian DA, Baric RS: **Coronavirus genome structure and replication.** *Coronavirus*  
572     *Replication and Reverse Genetics* 2005, **287**:1-30.
- 573     5. Yount B, Curtis KM, Fritz EA, Hensley LE, Jahrling PB, Prentice E, Denison MR,  
574     Geisbert TW, Baric RS: **Reverse genetics with a full-length infectious cDNA of severe**  
575     **acute respiratory syndrome coronavirus.** *Proceedings of the National Academy of*  
576     *Sciences of the United States of America* 2003, **100**(22):12995-13000.
- 577     6. Sola I, Almazan F, Zuniga S, Enjuanes L: **Continuous and Discontinuous RNA**  
578     **Synthesis in Coronaviruses.** *Annual Review of Virology, Vol 2* 2015, **2**:265-288.
- 579     7. Peiris JSM, Yuen KY, Osterhaus ADME, Stohr K: **Current concepts: The severe acute**  
580     **respiratory syndrome.** *New England Journal of Medicine* 2003, **349**(25):2431-2441.
- 581     8. Assiri A, McGeer A, Perl TM, Price CS, Al Rabeah AA, Cummings DAT, Alabdullatif  
582     ZN, Assad M, Almulhim A, Makhdoom H *et al*: **Hospital Outbreak of Middle East**  
583     **Respiratory Syndrome Coronavirus.** *New England Journal of Medicine* 2013,  
584     **369**(5):407-416.
- 585     9. Zhou P, Yang XL, Wang XG, Hu B, Zhang L, Zhang W, Si HR, Zhu Y, Li B, Huang CL *et*  
586     *al*: **A pneumonia outbreak associated with a new coronavirus of probable bat origin.**  
587     *Nature* 2020, **579**(7798):270-273.
- 588     10. Kim D, Lee J-Y, Yang J-S, Kim JW, Kim VN, Chang H: **The Architecture of**  
589     **SARS-CoV-2 Transcriptome.** *Cell* 2020, **181**(4):914-921.e910.
- 590     11. Davidson AD, Williamson MK, Lewis S, Shoemark D, Carroll MW, Heesom K, Zambon

- 
- 591 M, Ellis J, Lewis PA, Hiscox JA *et al*:  
592 2020:<https://www.biorxiv.org/content/10.1101/2020.1103.1122.002204v002201>.
- 593 12. Taiaroa G, Rawlinson D, Featherstone L, Pitt M, Caly L, Druce J, Purcell D, Harty L,  
594 Tran T, Roberts J *et al*:  
595 2020:<https://www.biorxiv.org/content/10.1101/2020.1103.1105.976167v976162>.
- 596 13. Shu YL, McCauley J: **GISAID: Global initiative on sharing all influenza data - from**  
597 **vision to reality**. *Eurosurveillance* 2017, **22**(13):2-4.
- 598 14. Lebrigand K, Magnone V, Barbry P, Waldmann R: **High throughput error corrected**  
599 **Nanopore single cell transcriptome sequencing**. *Nat Commun* 2020, **11**(1):4025.
- 600 15. Peng Q, Vijaya Satya R, Lewis M, Randad P, Wang Y: **Reducing amplification artifacts**  
601 **in high multiplex amplicon sequencing by using molecular barcodes**. *BMC Genomics*  
602 2015, **16**:589.
- 603 16. Schaecher SR, Mackenzie JM, Pekosz A: **The ORF7b protein of severe acute**  
604 **respiratory syndrome coronavirus (SARS-CoV) is expressed in virus-infected cells**  
605 **and incorporated into SARS-CoV particles**. *Journal of Virology* 2007, **81**(2):718-731.
- 606 17. Bojkova D, Klann K, Koch B, Widera M, Krause D, Ciesek S, Cinatl J, Münch C:  
607 **Proteomics of SARS-CoV-2-infected host cells reveals therapy targets**. *Nature* 2020,  
608 **583**:469-472.
- 609 18. Gordon DE, Jang GM, Bouhaddou M, Xu J, Obernier K, White KM, O'Meara MJ,  
610 Rezelj VV, Guo JZ, Swaney DL *et al*: **A SARS-CoV-2 protein interaction map reveals**  
611 **targets for drug repurposing**. *Nature* 2020, **583**:459-468.
- 612 19. Konno Y, Kimura I, Uriu K, Fukushi M, Irie T, Koyanagi Y, Nakagawa S, Sato K:

- 
- 613 2020:<https://www.biorxiv.org/content/10.1101/2020.1105.1111.088179v088171>.
- 614 20. Buchan DWA, Jones DT: **The PSIPRED Protein Analysis Workbench: 20 years on.**
- 615 *Nucleic Acids Research* 2019, **47**(W1):W402-W407.
- 616 21. Lam TT-Y, Shum MH-H, Zhu H-C, Tong Y-G, Ni X-B, Liao Y-S, Wei W, Cheung WY-M,
- 617 Li W-J, Li L-F *et al*: **Identifying SARS-CoV-2 related coronaviruses in Malayan**
- 618 **pangolins.** *Nature* 2020, **583**:282-285.
- 619 22. Pfefferle S, Krähling V, Ditt V, Grywna K, Mühlberger E, Drosten C: **Reverse genetic**
- 620 **characterization of the natural genomic deletion in SARS-Coronavirus strain**
- 621 **Frankfurt-1 open reading frame 7b reveals an attenuating function of the 7b protein**
- 622 **in-vitro and in-vivo.** *Virology journal* 2009, **6**:131-131.
- 623 23. Liang Y, Wang M-L, Chien C-S, Yarmishyn AA, Yang Y-P, Lai W-Y, Luo Y-H, Lin Y-T,
- 624 Chen Y-J, Chang P-C *et al*: **Highlight of Immune Pathogenic Response and**
- 625 **Hematopathologic Effect in SARS-CoV, MERS-CoV, and SARS-Cov-2 Infection.**
- 626 *Frontiers in Immunology* 2020, **11**:1022.
- 627 24. Molenkamp R, Spaan WJ: **Identification of a specific interaction between the**
- 628 **coronavirus mouse hepatitis virus A59 nucleocapsid protein and packaging signal.**
- 629 *Virology* 1997, **239**(1):78-86.
- 630 25. Fan H, Ooi A, Tan YW, Wang S, Fang S, Liu DX, Lescar J: **The nucleocapsid protein of**
- 631 **coronavirus infectious bronchitis virus: crystal structure of its N-terminal domain**
- 632 **and multimerization properties.** *Structure (London, England : 1993)* 2005,
- 633 **13**(12):1859-1868.
- 634 26. Wu C-H, Chen P-J, Yeh S-H: **Nucleocapsid Phosphorylation and RNA Helicase DDX1**

- 
- 635       **Recruitment Enables Coronavirus Transition from Discontinuous to Continuous**  
636       **Transcription.** *Cell Host & Microbe* 2014, **16**(4):462-472.
- 637   27. Canton J, Fehr AR, Fernandez-Delgado R, Gutierrez-Alvarez FJ, Sanchez-Aparicio MT,  
638       Garcia-Sastre A, Perlman S, Enjuanes L, Sola I: **MERS-CoV 4b protein interferes with**  
639       **the NF-kappaB-dependent innate immune response during infection.** *PLoS Pathog*  
640       2018, **14**(1):e1006838.
- 641   28. Kissler SM, Tedijanto C, Goldstein E, Grad YH, Lipsitch M: **Projecting the**  
642       **transmission dynamics of SARS-CoV-2 through the postpandemic period.** *Science*  
643       2020, **368**:860-868.
- 644   29. Wrobel AG, Benton DJ, Xu P, Roustan C, Martin SR, Rosenthal PB, Skehel JJ, Gamblin  
645       **SJ: SARS-CoV-2 and bat RaTG13 spike glycoprotein structures inform on virus**  
646       **evolution and furin-cleavage effects.** *Nat Struct Mol Biol* 2020, **27**(8):763-767.
- 647   30. Aboubakr HA, Sharafeldin TA, Goyal SM: **Stability of SARS-CoV-2 and other**  
648       **coronaviruses in the environment and on common touch surfaces and the influence of**  
649       **climatic conditions: A review.** *Transbound Emerg Dis* 2020, **68**:296-312.
- 650   31. Hurst KR, Koetzner CA, Masters PS: **Characterization of a critical interaction**  
651       **between the coronavirus nucleocapsid protein and nonstructural protein 3 of the**  
652       **viral replicase-transcriptase complex.** *Journal of virology* 2013, **87**(16):9159-9172.
- 653   32. Lei J, Kusov Y, Hilgenfeld R: **Nsp3 of coronaviruses: Structures and functions of a**  
654       **large multi-domain protein.** *Antiviral Research* 2018, **149**:58-74.
- 655   33. Chang C-k, Hou M-H, Chang C-F, Hsiao C-D, Huang T-h: **The SARS coronavirus**  
656       **nucleocapsid protein – Forms and functions.** *Antiviral Research* 2014, **103**:39-50.

- 
- 657 34. Wang N, Li S-Y, Yang X-L, Huang H-M, Zhang Y-J, Guo H, Luo C-M, Miller M, Zhu G,  
658 Chmura AA *et al*: **Serological Evidence of Bat SARS-Related Coronavirus Infection in**  
659 **Humans, China.** *Virologica Sinica* 2018, **33**(1):104-107.
- 660 35. Li H: **A statistical framework for SNP calling, mutation discovery, association**  
661 **mapping and population genetical parameter estimation from sequencing data.**  
662 *Bioinformatics* 2011, **27**(21):2987-2993.
- 663 36. **vcf-annotator** [<https://github.com/rpetit3/vcf-annotator>]
- 664 37. Hyatt D, Chen GL, Locascio PF, Land ML, Larimer FW, Hauser LJ: **Prodigal:**  
665 **prokaryotic gene recognition and translation initiation site identification.** *BMC*  
666 *Bioinformatics* 2010, **11**:119.
- 667 38. Katoh K, Misawa K, Kuma K, Miyata T: **MAFFT: a novel method for rapid multiple**  
668 **sequence alignment based on fast Fourier transform.** *Nucleic Acids Res* 2002,  
669 **30**(14):3059-3066.
- 670 39. Minh BQ, Schmidt HA, Chernomor O, Schrempf D, Woodhams MD, von Haeseler A,  
671 Lanfear R: **IQ-TREE 2: New Models and Efficient Methods for Phylogenetic**  
672 **Inference in the Genomic Era.** *Mol Biol Evol* 2020, **37**(5):1530-1534.
- 673



674 **FIGURE LEGEND**

675 **Fig. 1: Study overview and the sgRNA profile of SARS-CoV-2.** (A) Study overview; Top  
676 panel, datasets used in this study came from different hosts infected by different  
677 coronaviruses , for in-vitro studies, a cell line culturing step was added. These samples were  
678 subjected to meta-transcriptomic sequencing and reads were collected from Short Read  
679 Archive. Bottom panel, reads mapped to viruses' genome. Alignment of reads spanning the  
680 genome shows breakpoints sites. As viral sgRNAs were formed via the recombination of  
681 transcript body and a fixed 5' leader via TRS homology, breakpoints with 5' position close to  
682 leader TRS were sent to sub-genomic RNA profiling. (B) The canonical breakpoints plot of  
683 SARS-CoV-2. The ratio of putative sub-genomic RNA, black bar indicates relative  
684 abundance of profiled sgRNA. (C) ORF annotation and comparison among 3 coronaviruses.  
685 Different color of blocks represent sgRNA supportive stat of that gene. Specially, red blocks  
686 demonstrate novel sgRNA the algorithm identified.

687 **Fig. 2: Novel sgRNAs and responsive translational product for SARS-CoV-2.** (A)  
688 Breakpoints plot for SARS-CoV-2 showing the three novel breakpoints at relative abundance  
689 cut-off of 0.1%, putative TRS sequences were shown below. Count of classical breakpoints  
690 were shown in grey as background. Peptides of novel ORFs, i.e. putative ORF2b (pORF2b)  
691 and truncated ORF7b (tORF7b), were shown in inlets, secondary structures of these peptides  
692 were predicted and shown in different color. Specially, a complete ORF7b peptide was shown  
693 in grey as a reference for the truncated one; (B) Sequence homology between leader TRS  
694 (top), sgRNA (middle) and body TRS (bottom) for novel sgRNAs, TRS core were shown in  
695 blue. (C) Structural conservation of novel peptide translated from newly discovered sgRNA

696 putative ORF2b, left panel demonstrates consensus phylogenetic tree of responsive  
697 coronavirus determined by genomic sequences, right panel compared second structure of  
698 novel peptide predicted by PSIPRED Workbench. (D) Putative ORF2b in pangolin CoV  
699 shows homology with IL17RB's fibronectin III like domain, which is also a ligand binding  
700 domain.

701 **Fig. 3: Heatmap of sgRNA expression profile of SARS-CoV-2 with SNP annotation.** Left  
702 panel shows sgRNA expression profile of SARS-CoV-2 in the transcriptomic or  
703 meta-transcriptomic dataset profiled. Right panel shows all the SNP sites with annotation of  
704 the responsive biosamples. Interestingly, virus strains from SRX7852918 and Kim et al had  
705 distinctive SNP pattern as well as characteristic expression profiles.

706 **Fig.4: Comparison of *in-vivo* and *in-vitro* sgRNA expression. (A) and (B)** Expression  
707 profile of SARS-CoV-2 and MERS-CoV, both *in-vivo* and *in-vitro* datasets were included. It  
708 should be noticed that two third generation sequencing technology data were added as  
709 complementary datasets to SARS-CoV-2 *in-vitro* plot, a math model was applied to adjust  
710 long read expression ratio into an adapted version which was comparable with short read  
711 archive datasets. Interestingly, higher levels of S and M expression ratio and lower level N  
712 expression ratio were observed in *in-vivo* sample versus *in-vitro* sample in these two  
713 coronaviruses. (C) Phylogenetic tree of involved coronaviruses (left), scale bar indicates  
714 phylogenetic distance which were calculated as the ratio of nonidentical base positions to all  
715 base positions, taxonomic classification at genus level were indicated at left part. Expression  
716 ratio of Spike (S) genes in vivo and in vitro in different coronaviruses (right), each dot  
717 represent a biosample, black bars indicate average expression level of responsive virus.

718

719 **SUPPLEMENTARY INFORMATION**

720 **Additional file 1: Fig. S1:** Coverage plot for in-vivo and in-vitro datasets. **(A)** Coverage plot  
721 for SRX8089279, which is a representative of in-vitro sample. In-vivo RNA-Seq reads  
722 relatively evenly mapped to viral genome, indicating a genomic RNA dominated sample. **(B)**  
723 Coverage plot for SRX7736886, which is a representative of in-vivo sample. In-vitro reads  
724 resulted a dense mapping at 3' and 5' end of the genome, which revealed active viral  
725 transcription and replication in cultured cells.

726 **Additional file 2: Fig. S2 :** Breakpoint profile of 4 coronaviruses. **(A)** Breakpoints profile of  
727 SARS-CoV; **(B)** Breakpoints profile of MERS-CoV; **(C)** Breakpoints profile of  
728 Pangolin-CoV; **(D)** Breakpoints profile of HKU1, interestingly, this virus uses long TRS for  
729 discontinuous sgRNA production.

730 **Additional file 3: Fig. S3:** Novel sgRNA breakpoint and TRS sequence. **(A)** Alternative TRS  
731 of M in SARS-CoV-2. The canonical TRS region (upper panel) has 12 bases while the novel  
732 one has only 6 (lower panel), start codon of M was shown in red. **(B)** TRS for tORF7b in  
733 SARS-CoV-2, which has 7 bases overlapped with leader TRS. **(C)** TRS for pORF8c in  
734 MERS-CoV. **(D)** and **(E)** Structural conservation of novel peptide translated from newly  
735 discovered sgRNA truncated ORF7b and putative ORF8c, left panel demonstrates consensus  
736 phylogenetic tree of responsive coronavirus determined by genomic sequences, right panel  
737 compared second structure of novel peptide predicted by PSIPRED Workbench.

738 **Additional file 4: Fig. S4:** Detailed gene expression profile of SARS-CoV-2 and MERS-CoV.

739 **(A)** and **(B)** Detailed accessory gene expression profile of SARS-CoV-2 and MERS-CoV,  
740 between in-vivo and iv-vitro datasets. Remarkably, MERS-CoV had higher ORF4a in-vivo  
741 expression level while lower in-vivo ORF5 expression level. **(C)** and **(D)** Gene expression  
742 level of SARS-CoV-2 and MERS-CoV among different hosts.

743 **Additional file 5: Fig. S5:** Detailed gene expression profile of MERS-CoV in PRJNA233943  
744 & PRJNA233944. In this study, cells infected with MERS-CoV were treated with different  
745 drugs, i.e. Gleevec and IFN- $\beta$ , after 24 or 48h post-infection, distinct pattern can be observed  
746 from viral gene expression profile as condition alters, especially for IFN- $\beta$ , treated 24 hpi and  
747 48 hpi resulted in distinct expression levels among several structural and accessory genes. It  
748 also indicates that our analytical pipeline CORONATATOR is a powerful and sensitive tool  
749 for analyzing how experimental manipulation effects the relative expression of specific  
750 sgRNAs.

751 **Additional file 6: Fig. S6 :** Outliers in expression profiles harbour interesting SNPs. **(A)** and  
752 **(B)** The in-vivo sample from Kim et al 2020 had S expression level similar to that of in-vitro  
753 samples. While also have a few mutations in ORF1a that's not found in other viral strains.  
754 Mirroring this, the in-vitro sample SRX7852918 have S expression level similar to that of  
755 in-vivo samples, and hold several private mutations in ORF1a as well.

756 **Additional file 7: Table S1 :** Meta information of samples collected.

757 **Additional file 8: Table S2 :** Annotation of SARS-CoV-2, SARS-CoV and MERS-CoV.

758 **Additional file 9: Table S3:** SARS-CoV-2 sgRNA abundance across samples.

759 **Additional file 10: Table S4:** Conservation of selected novel proteins.

760 **Additional file 11: Table S5:** List of novel sgRNAs.

761

762

**Fig. 1**

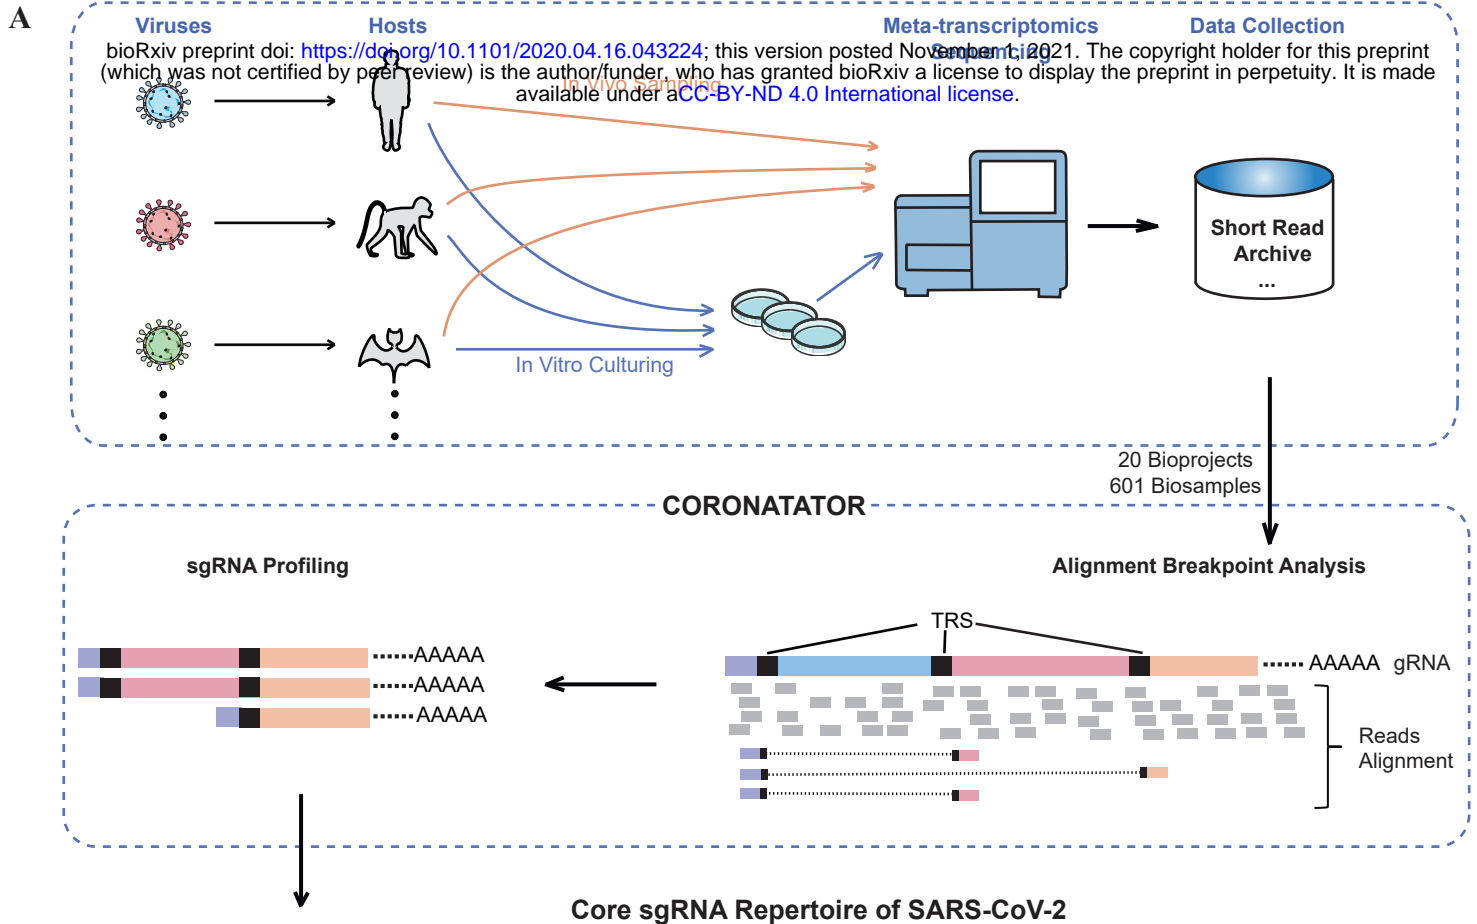

**B**

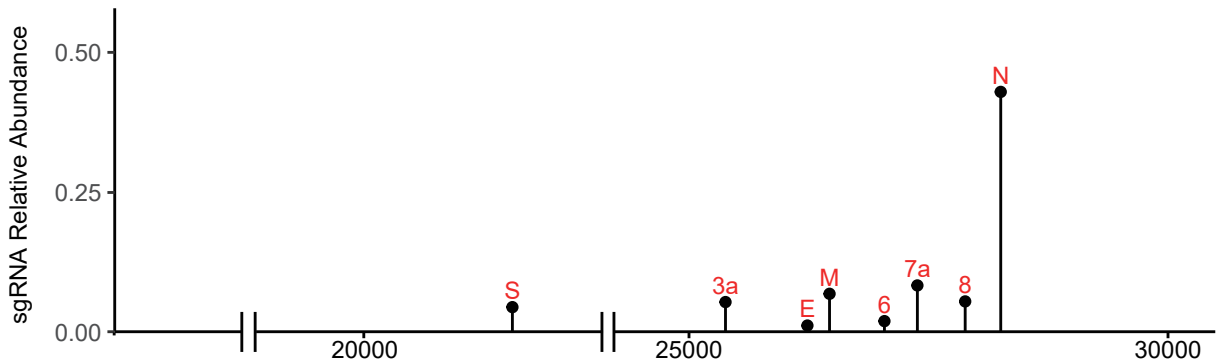

**C**

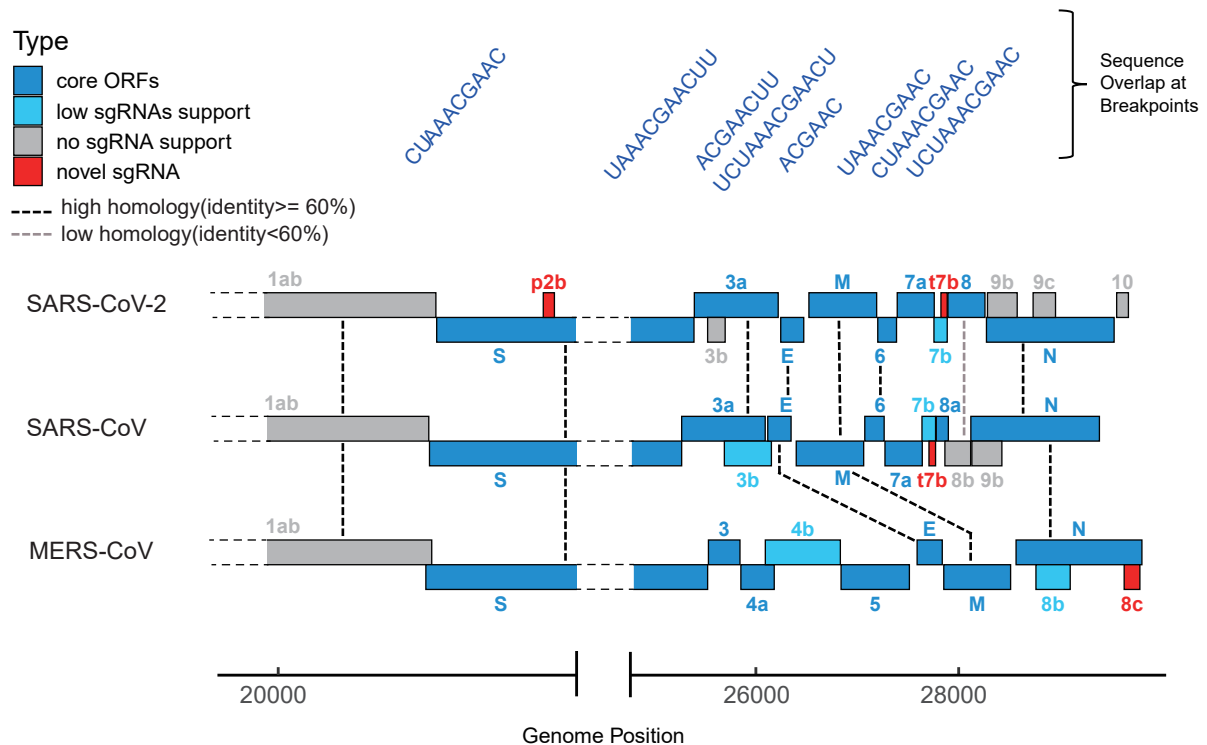

**Fig. 2**

**Novel sgRNA in SARS-CoV-2**

**A**

bioRxiv preprint doi: <https://doi.org/10.1101/2020.04.16.043224>; this version posted November 1, 2021. The copyright holder for this preprint (which was not certified by peer review) is the author/funder, who has granted bioRxiv a license to display the preprint in perpetuity. It is made available under aCC-BY-ND 4.0 International license.

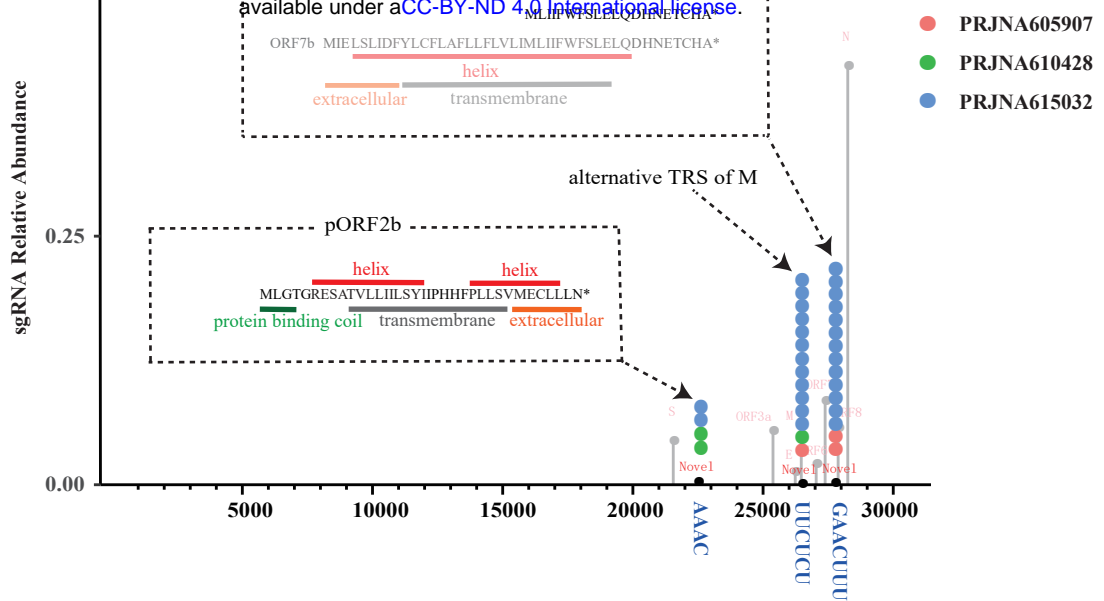

**B**

**Breakpoint and TRS of SARS-CoV-2 pORF2b(two alternatives)**

TRS core

Leader 51 UUGUAGAUCUGUUCUCUAAACGAACUUUAAAUCUGUGUGG 91  
 |||  
 sgRNA1 UUGUAGAUCUGUUCUCUAAACUUCUAAACUUUAGAGTCCAAC  
 |||  
 Body 22486 AGAAAAGGAAUCUAUCAAAACUUCUAAACUUUAGAGUCCAAC 22526

Leader 51 UUGUAGAUCUGUUCUCUAAACGAACUUUAAAUCUGUGUGG 91  
 |||  
 sgRNA2 UUGUAGAUCUGUUCUCUAAACUAAACUUUAGAGUCCAACCAA  
 |||  
 Body 22489 AAAAGGAAUCUAUCAAAACUUCUAAACUUUAGAGUCCAACCAA 22529

**C**

**Structural conservation of the SARS-CoV-2 pORF2b amongst selected Sarbecoviruses**

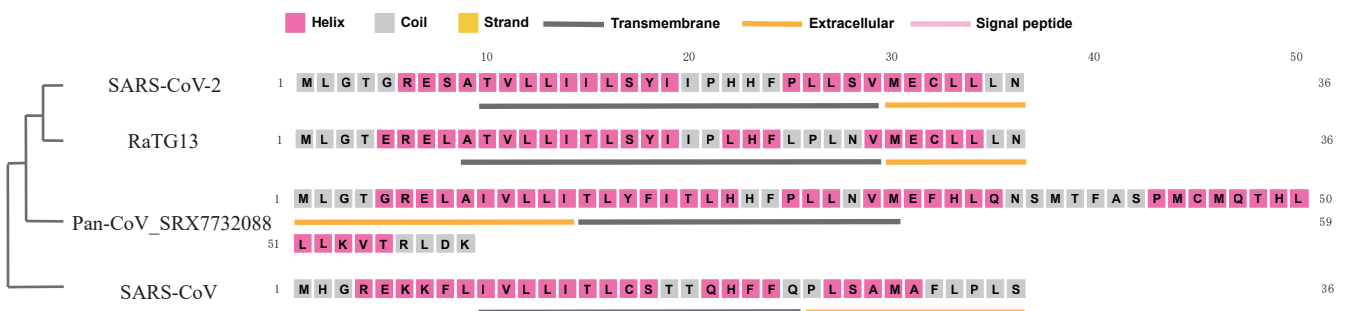

**D**

**Putative ORF2b in pangolin showing homology with IL-17 receptor B**

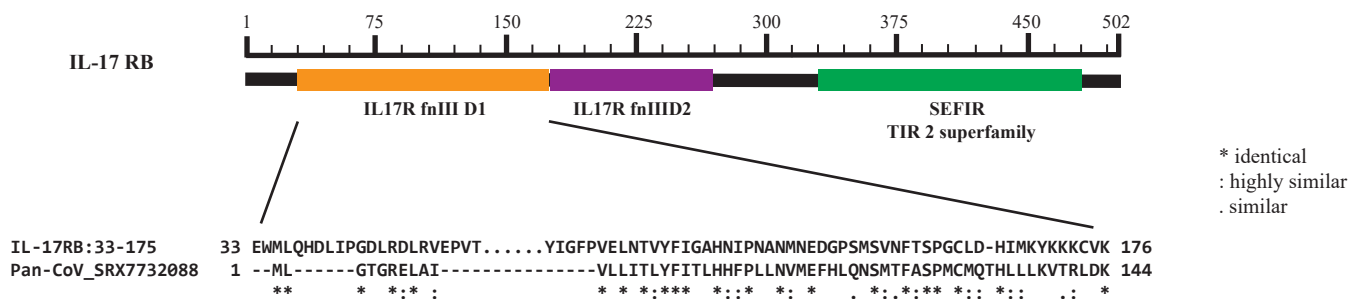

Fig. 3

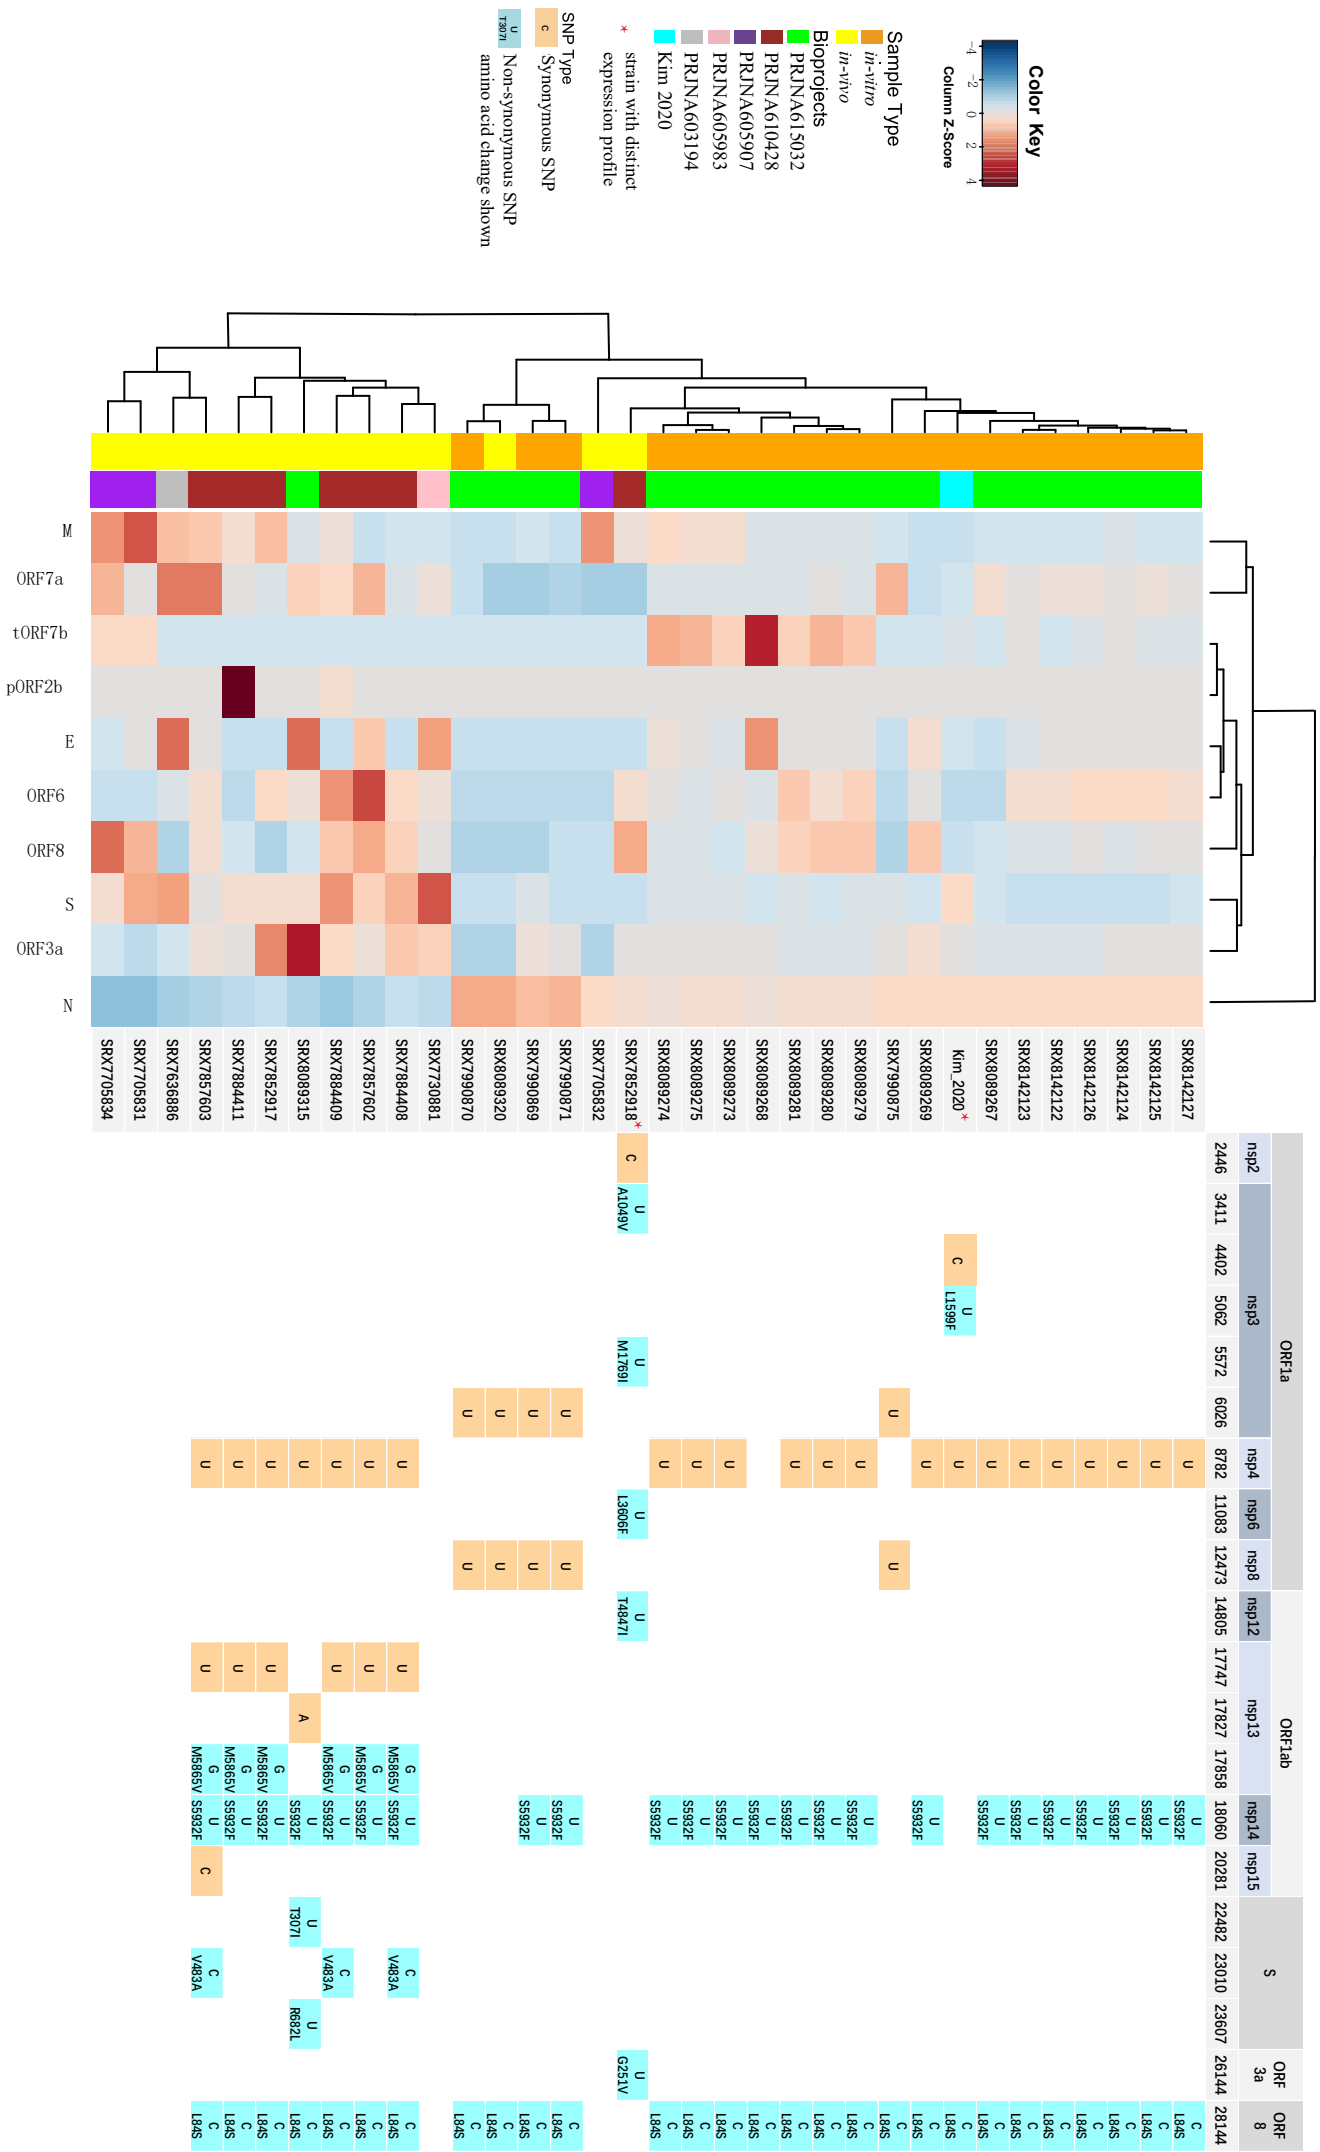



**Fig 4.**

**In-vivo versus in-vitro, SARS-CoV-2**

**A** bioRxiv preprint doi: <https://doi.org/10.1101/2020.04.16.043224>; this version posted November 1, 2021. The copyright holder for this preprint (which was not certified by peer review) is the author/funder, who has granted bioRxiv a license to display the preprint in perpetuity. It is made available under aCC-BY-ND 4.0 International license.

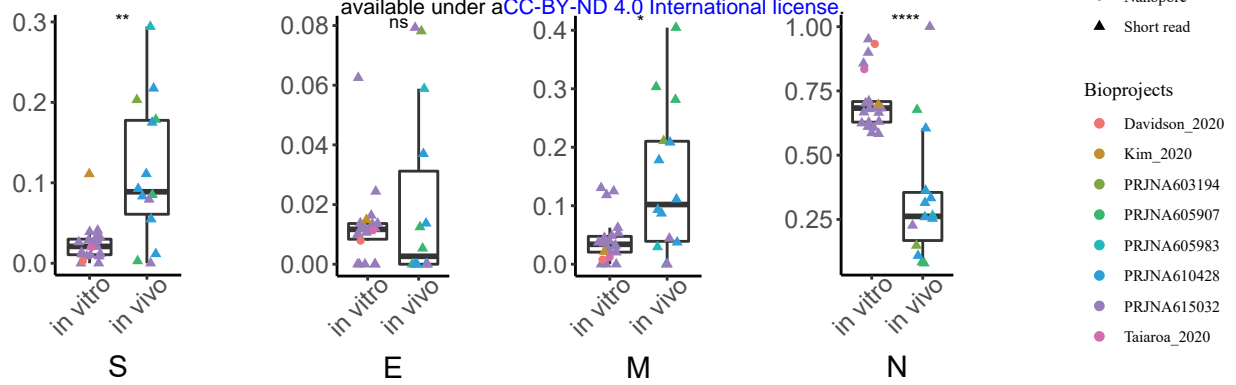

**B**

**In-vivo versus in-vitro, MERS-CoV**

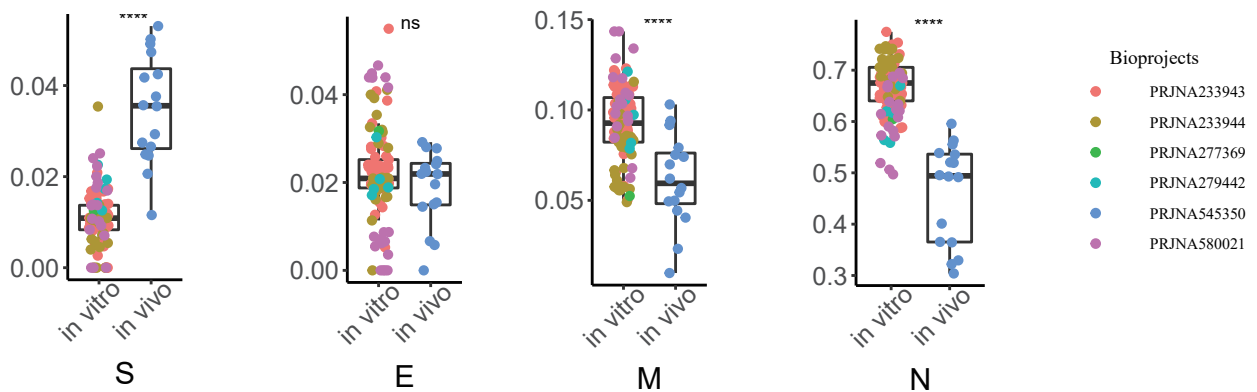

**C**

**Phylogenetic Tree of Involved Coronaviruses**

**Expression of S in Vivo Across Coronaviruses**

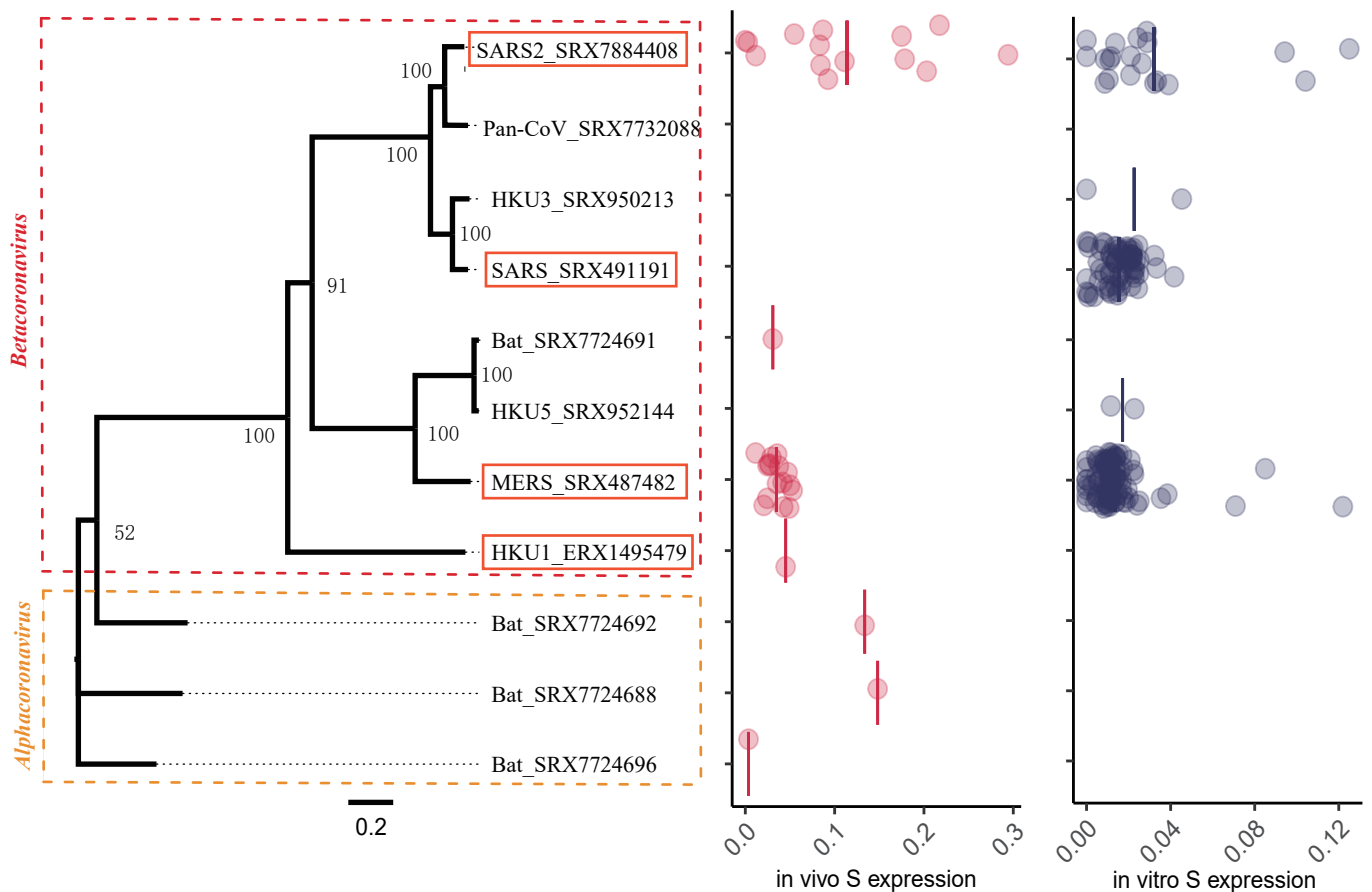

**Fig. S1**

bioRxiv preprint doi: <https://doi.org/10.1101/2020.04.16.043224>; this version posted November 1, 2021. The copyright holder for this preprint (which was not certified by peer review) is the author/funder, who has granted bioRxiv a license to display the preprint in perpetuity. It is made available under aCC-BY-ND 4.0 International license.

**A**

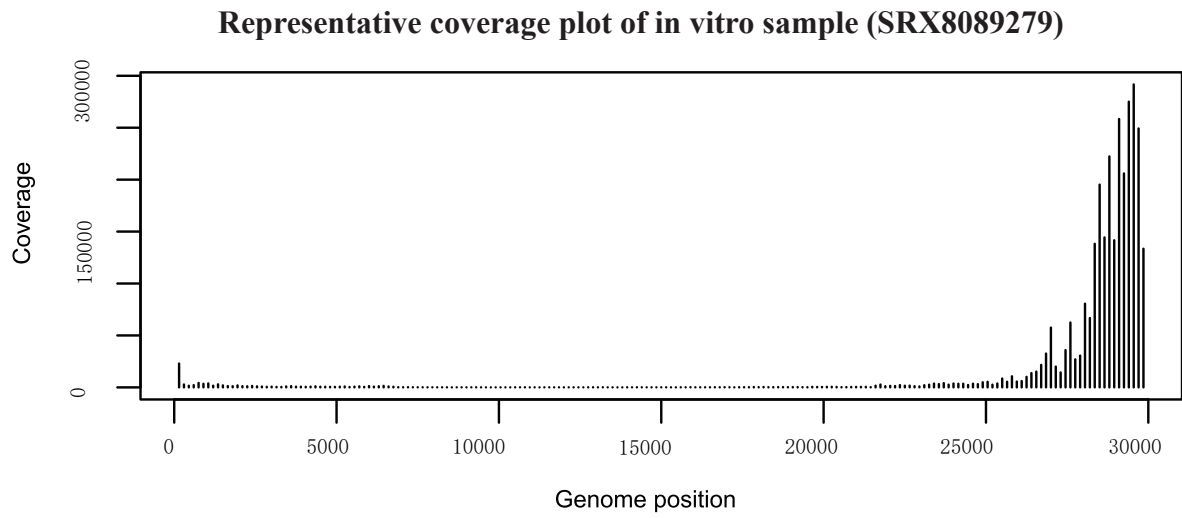

**B**

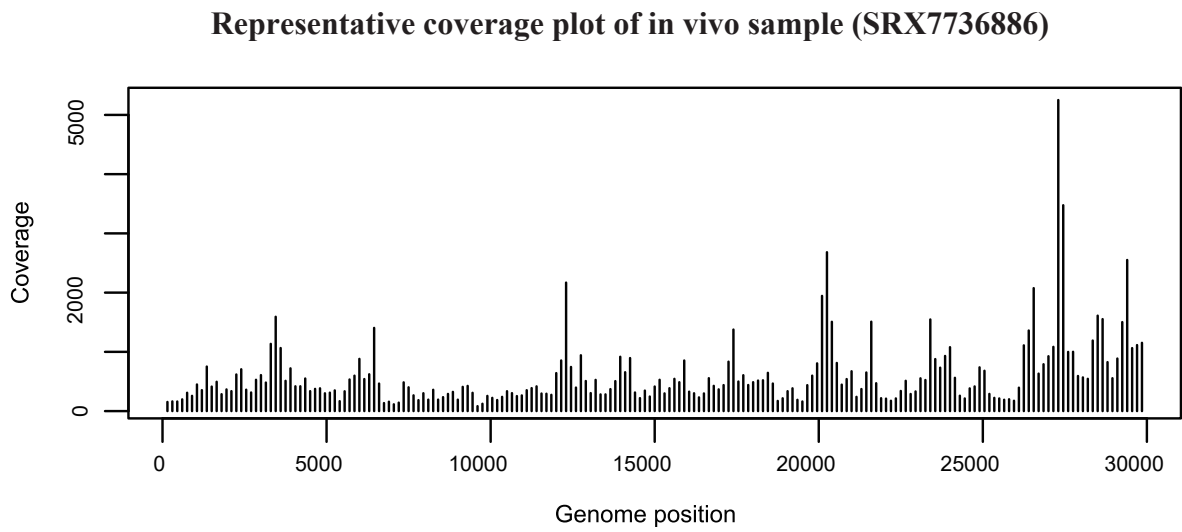





C

The sgRNA Profile of Pan-CoV

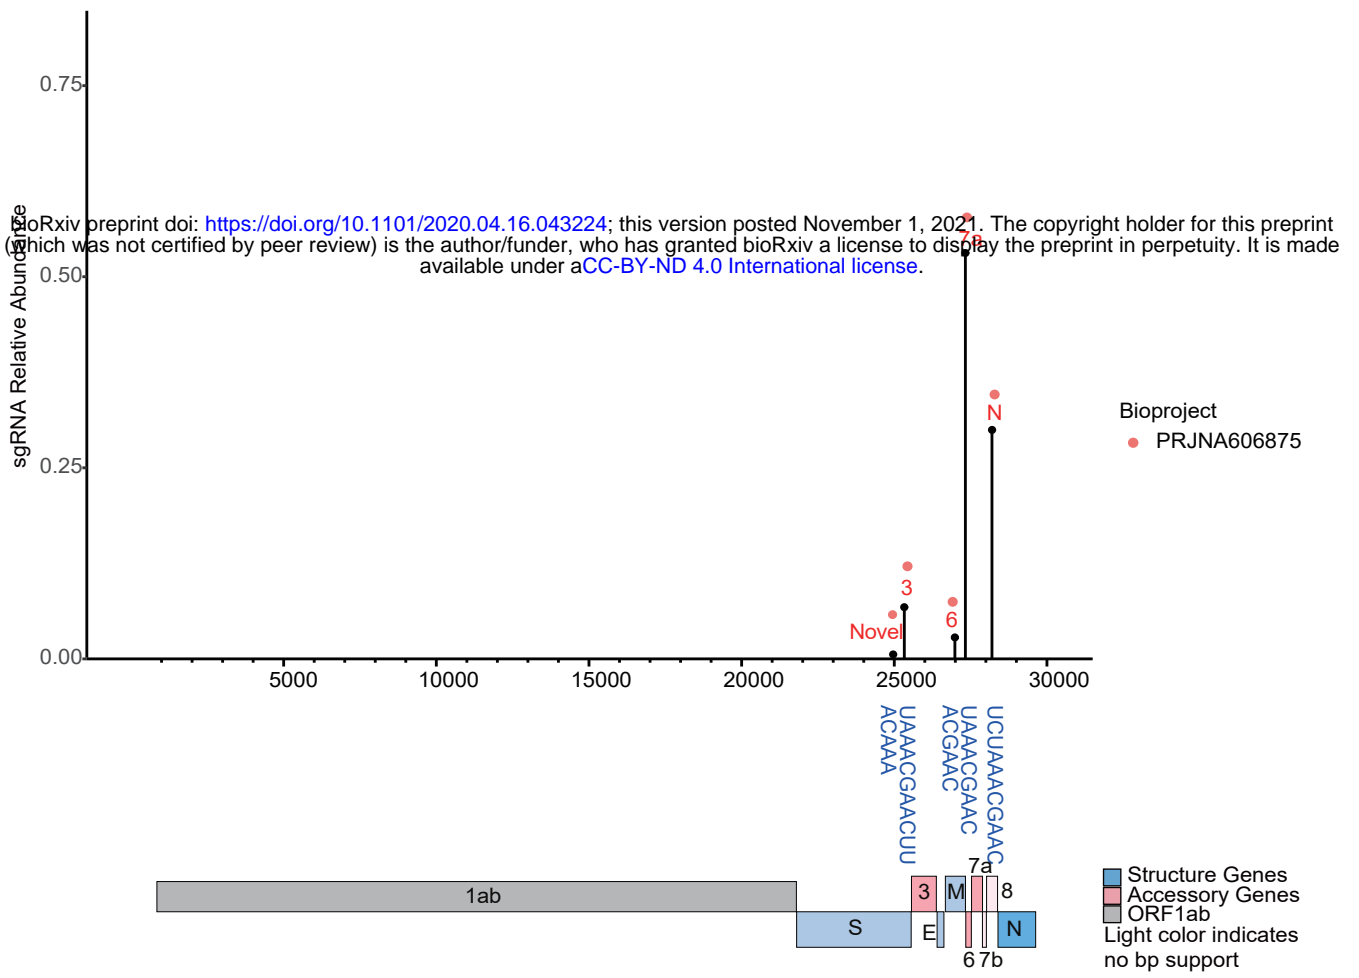

D

The sgRNA Profile of HKU1

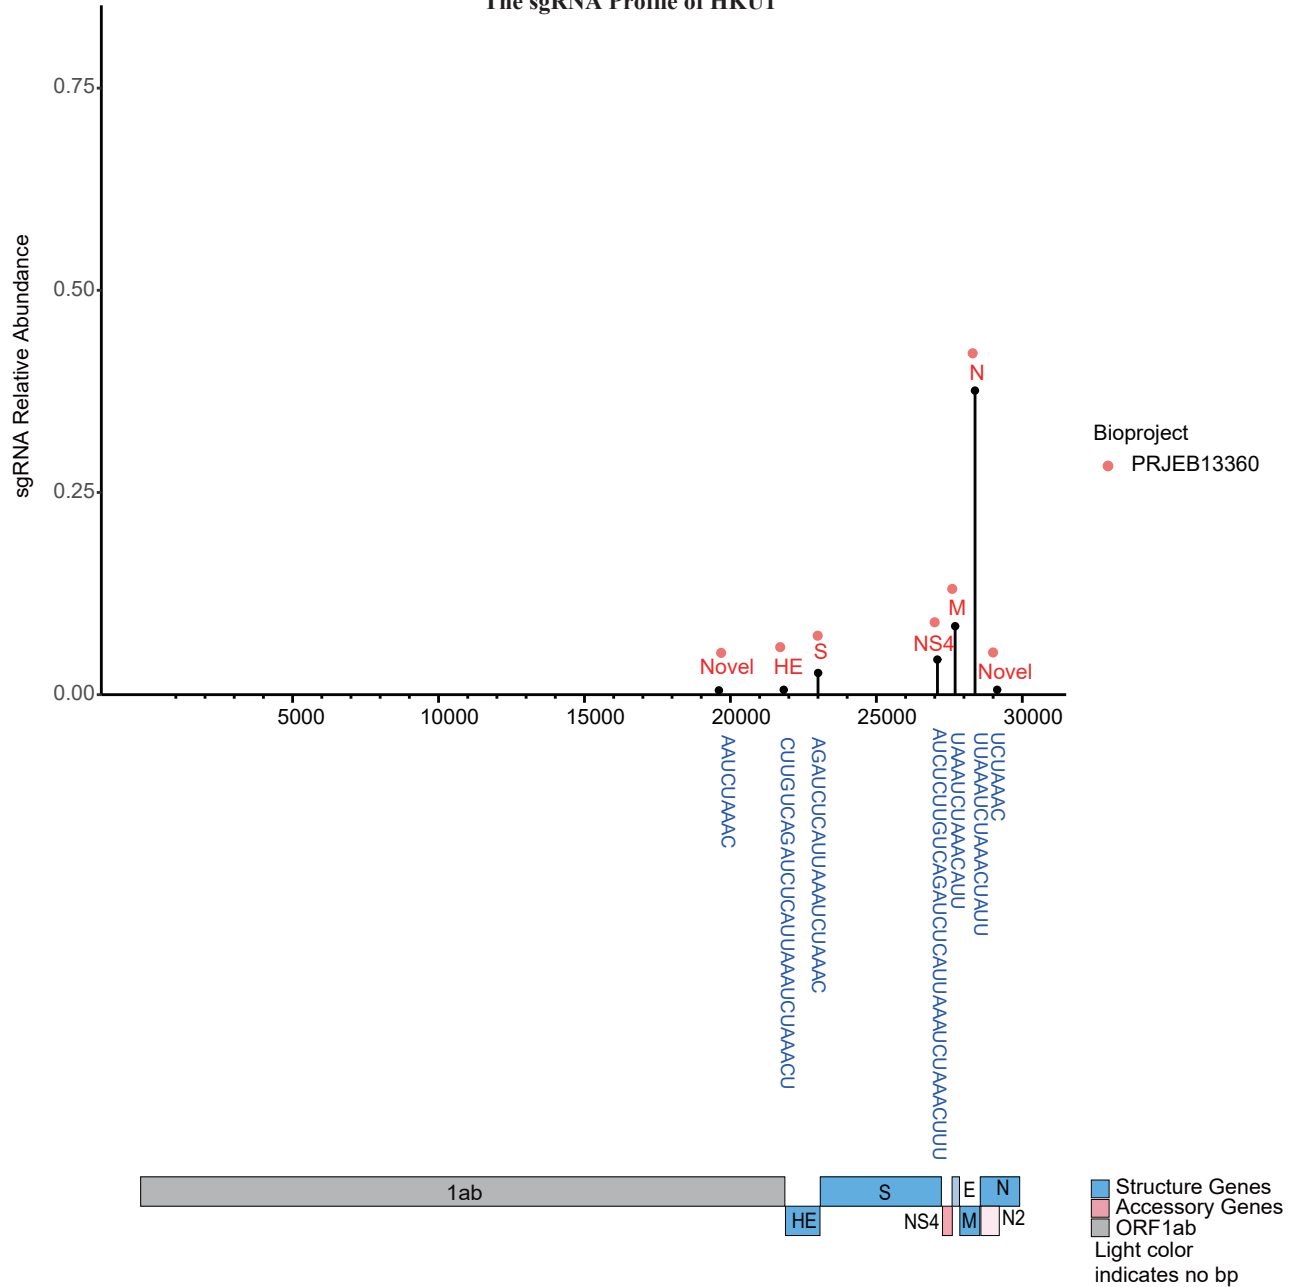

**Fig. S3**

bioRxiv preprint doi: <https://doi.org/10.1101/2020.04.16.043224>; this version posted November 1, 2021. The copyright holder for this preprint (which was not certified by peer review) is the author/funder, who has granted bioRxiv a license to display the preprint in perpetuity. It is made available under aCC-BY-ND 4.0 International license.

**A**

```

Leader 51 UUGUAGAUCUGUUCUCUAAACGAACUUUAAAAUCUGUGUGG 91
          |||
sgRNA.cano UUGUAGAUCUGUUCUCUAAACGAACUAAUUAUUUAUUAGU
          |||
Body 26454 UCCUGAUCUUCUGGUCUAAACGAACUAAUUAUUUAUUAGU 26494

Leader 51 UUGUAGAUCUGUUCUCUAAACGAACUUUAAAAUCUGUGUGG 91
          |||
sgRNA.alt UUGUAGAUCUGUUCUGU-UUGGAACUUUAAUUUUAGCCAUG
          |||
Body 26486 UAUUAUAGUUUUUCUGU-UUGGAACUUUAAUUUUAGCCAUG 26525
                                     M start
    
```

**B**

**SARS-CoV-2 tORF7b**

```

Leader 51 UUGUAGAUCUGUUCUCUAAACGAACUUUAAAAUCUGUGUGG 91
          |||
sgRNA    UUGUAGAUCUGUUCUCUAAACGAACUUUCAUUAUUUGACUU
          |||
Body 27741 CAAAAGAAAGACAGAAUGAUUGAACUUUCAUUAUUUGACUU 27781
    
```

**C**

**MERS-CoV pORF8c**

```

Leader 51 ACUUUGAUUUUUAACGAACUUAAAUAAGCCUGUUGUUUA 91
          |||
sgRNA    ACUUUGAUUUUUAACGAACUUAAAAGAUCCCAACUACAAUAA
          |||
Body 29562 GGAGCCAUUAACUUGACCCAAAGAAUCCCAACUACAAUAA 29602
    
```

**D**

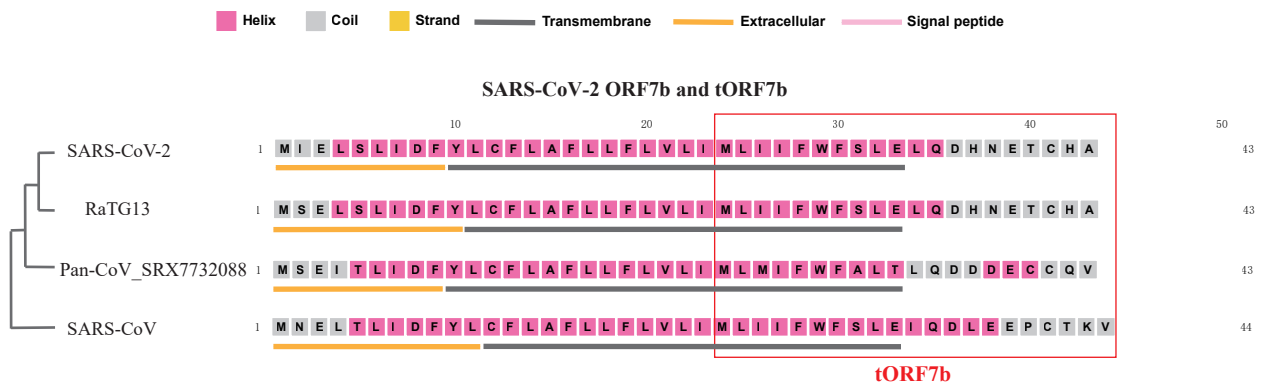

**E**

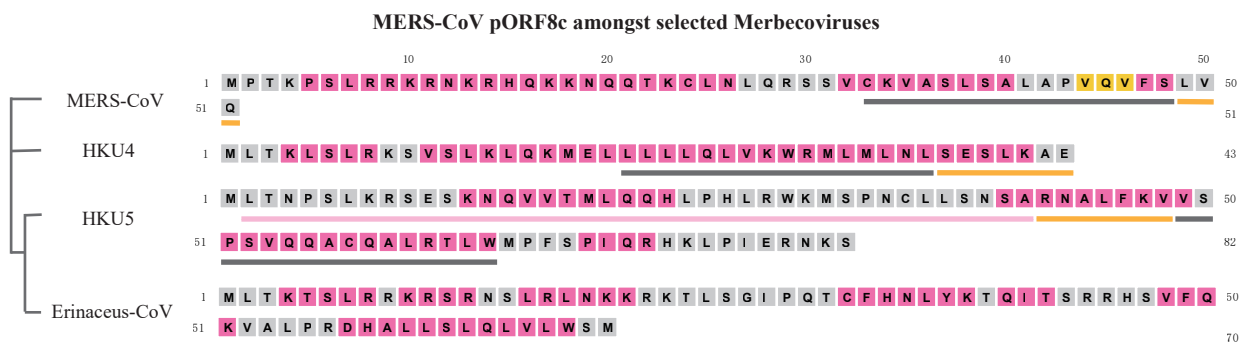

**Fig. S4****Expression of Accessory proteins, In-vivo versus in-vitro, SARS-CoV-2**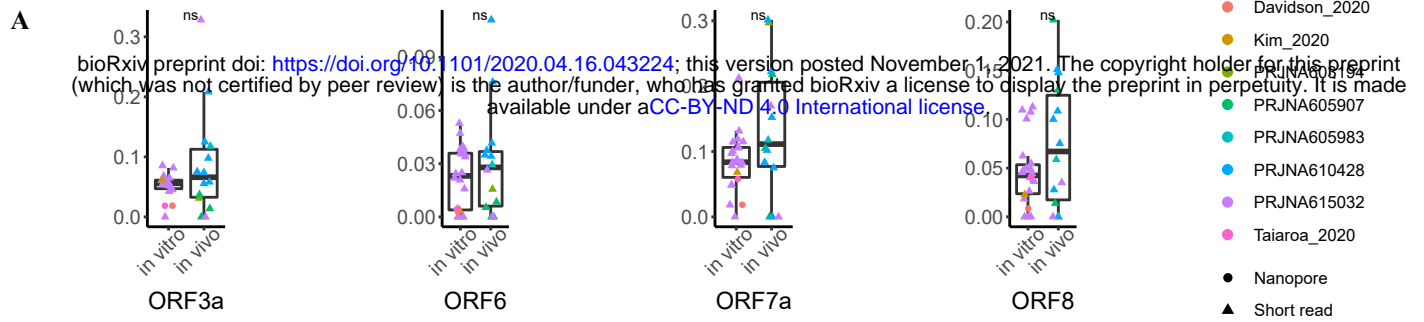**Expression of Accessory proteins, In-vivo versus in-vitro, MERS-CoV**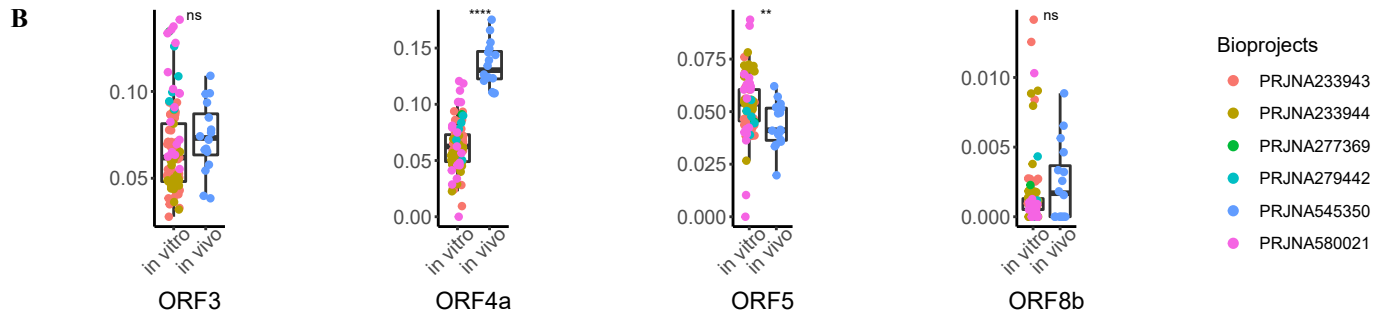**In-vivo versus in-vitro, SARS-CoV-2, Colored by hosts**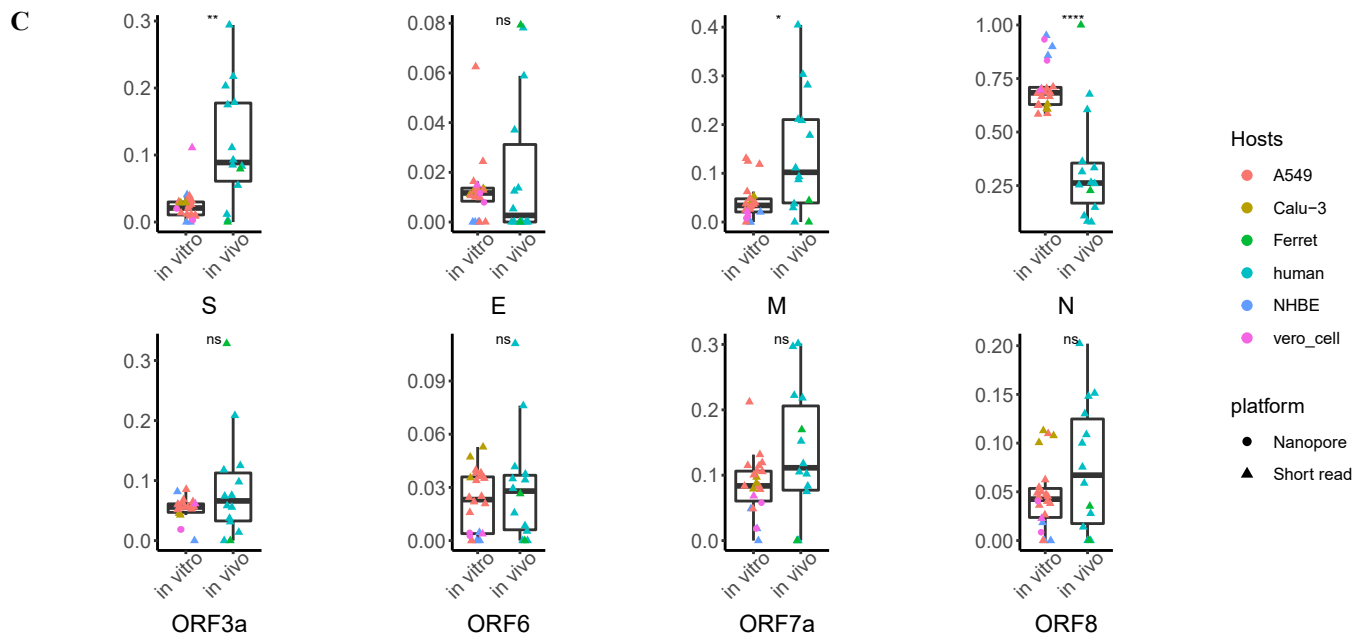**In-vivo versus in-vitro, MERS-CoV, Colored by hosts**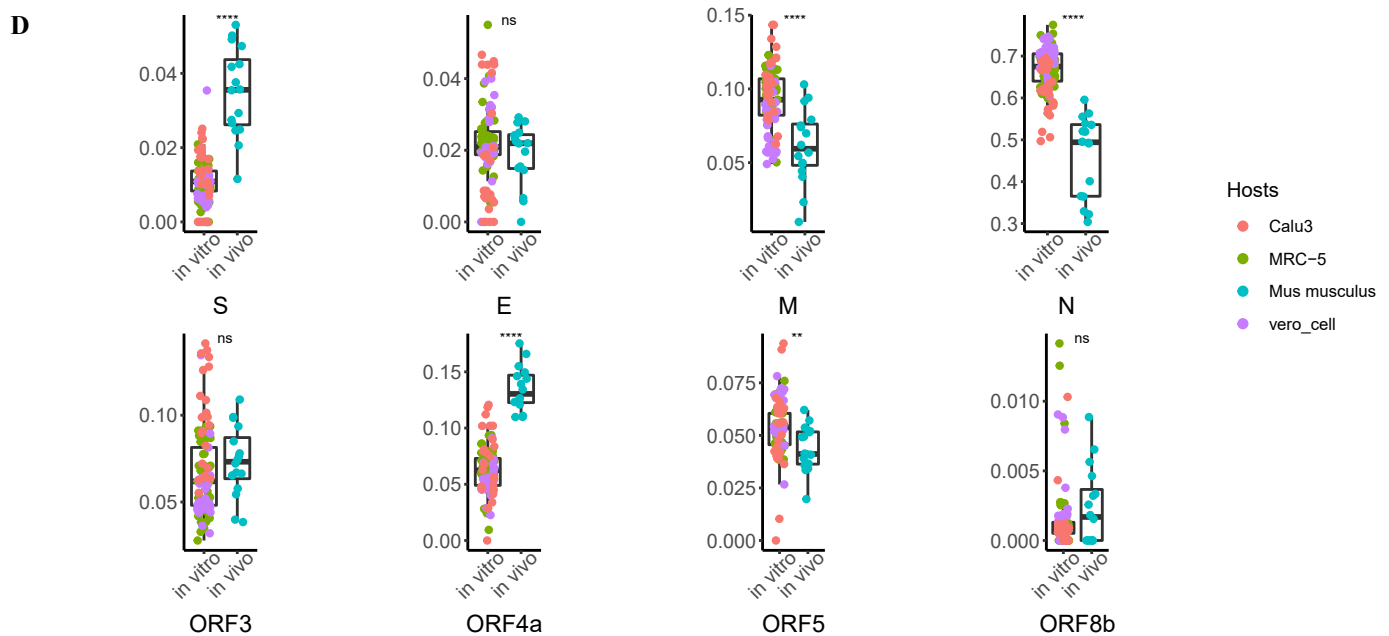

bioRxiv preprint doi: <https://doi.org/10.1101/2020.04.16.043224>; this version posted November 1, 2021. The copyright holder for this preprint (which was not certified by peer review) is the author/funder, who has granted bioRxiv a license to display the preprint in perpetuity. It is made available under aCC-BY-ND 4.0 International license.

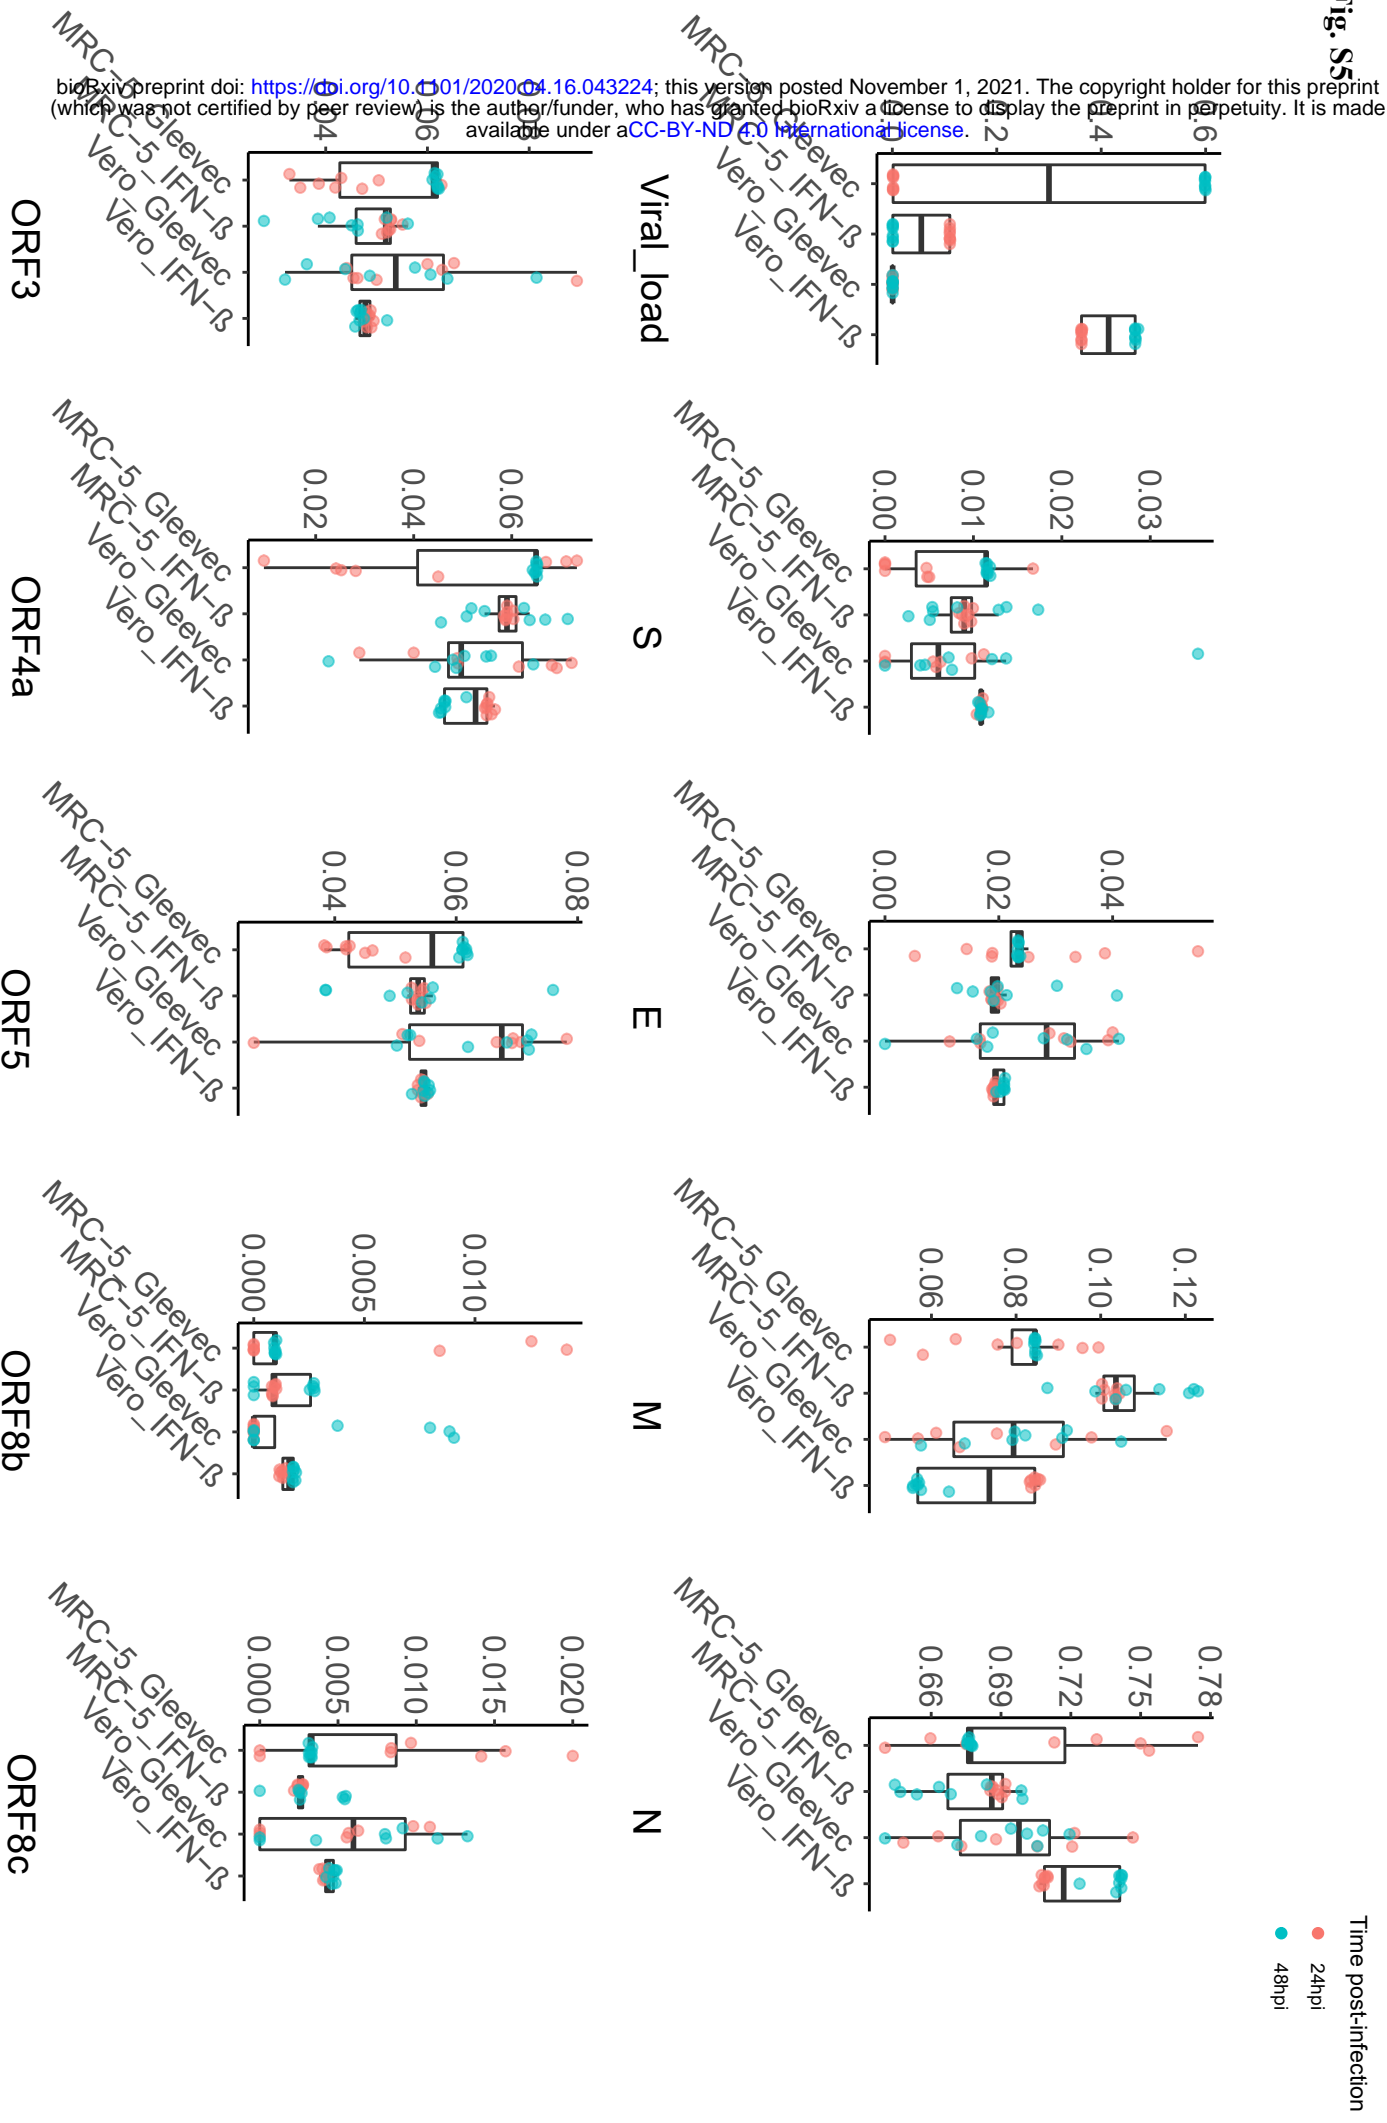



**Fig. S6**

bioRxiv preprint doi: <https://doi.org/10.1101/2020.04.16.043224>; this version posted November 1, 2021. The copyright holder for this preprint (which was not certified by peer review) is the author/funder, who has granted bioRxiv a license to display the preprint in perpetuity. It is made available under a [CC-BY-ND 4.0 International license](https://creativecommons.org/licenses/by-nd/4.0/).

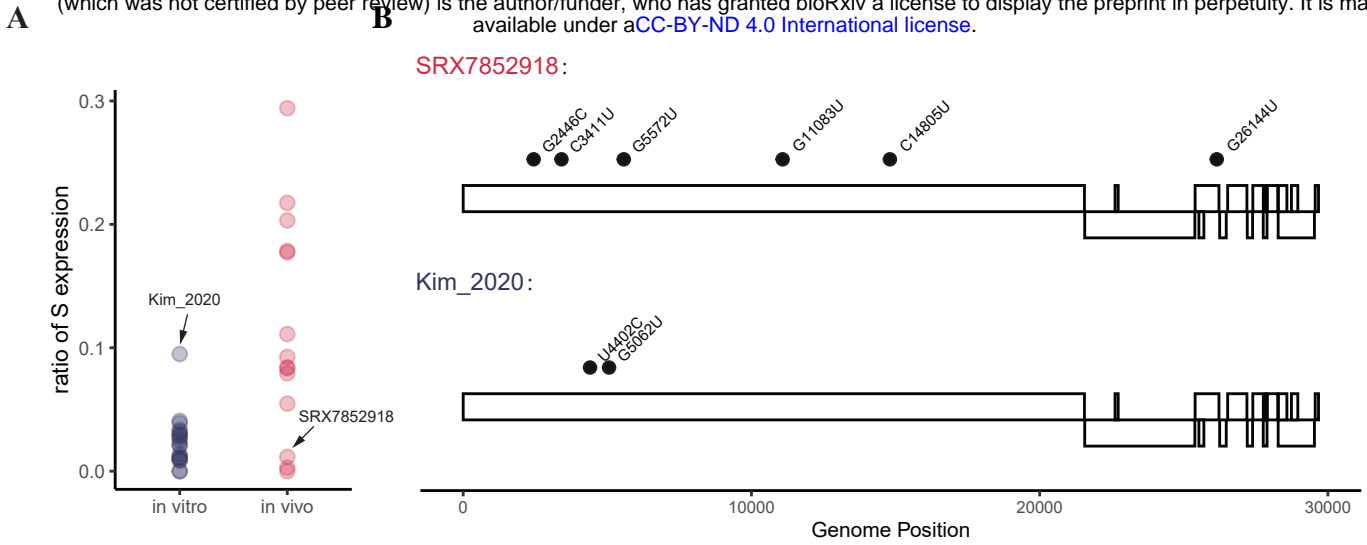

Source: http://biorxiv.org/content/10.1101/2020.04.16.043224v2.full.pdf
